1 **Full paper**

2 **A Physcomitrella PIN protein acts in spermatogenesis and sporophyte abortion**

3 **Volker M. Lüth<sup>1</sup>, Christine Rempfer<sup>1,2</sup>, Oliver Herzog<sup>1</sup>, Melanie Roecker<sup>1,\*</sup>, Marion Braun<sup>1</sup>, Eva**  
4 **L. Decker<sup>1</sup> and Ralf Reski<sup>1,2,3,4</sup>**

5 <sup>1</sup>Plant Biotechnology, Faculty of Biology, University of Freiburg, Freiburg, Germany

6 <sup>2</sup>Speman Graduate School of Biology and Medicine (SGBM), University of Freiburg, Freiburg,  
7 Germany

8 <sup>3</sup>CIBSS – Centre for Integrative Biological Signalling Studies, University of Freiburg, Freiburg,  
9 Germany

10 <sup>4</sup>Cluster of Excellence *livMatS* @ FIT – Freiburg Center for Interactive Materials and Bioinspired  
11 Technologies, University of Freiburg, Freiburg, Germany

12

13 Current address:

14 \* Leibniz Institute of Vegetable and Ornamental Crops (IGZ), Großbeeren, Germany

15 Author for correspondence: *Ralf Reski, Email: ralf.reski@biologie.uni-freiburg.de*

16 **Key words:** auxin, bryophyte, flagellum, moss, plant development, sperm, spermatozoid

17 **Summary**

18 • The auxin efflux PIN-FORMED (PIN) proteins are conserved in all land plants and important  
19 players in plant development. In the moss *Physcomitrella* (*Physcomitrium patens*) three  
20 canonical PINs (PpPINA-C) are expressed in the gametophore. PpPINA and PpPINB show  
21 functional activity in vegetative growth and sporophyte development. Here, we examined the  
22 role of PpPINC in the life cycle of *Physcomitrella*.

23 • We established reporter and knockout lines for PpPINC and analysed vegetative and  
24 reproductive tissues using microscopy and transcriptomic sequencing of moss gametangia.

25 • PpPINC is expressed in immature leaves, mature gametangia and during sporophyte  
26 development. The sperm cells (spermatozoids) of knockout mutants exhibit increased motility  
27 compared to the wild type and show an altered flagella phenotype. Further, the knockout  
28 mutants have a significantly increased fertility, and an increased abortion rate of premeiotic  
29 sporophytes.

30 • Here, we show that PpPINC is an important regulator for spermatogenesis and sporophyte  
31 development. We propose an evolutionary conserved way of polar growth during early moss  
32 embryo development and sporophyte attachment, while suggesting the mechanical function in  
33 sporophyte securement of a ring structure, the Lorch ring.

## 34 Introduction

35 The auxin signal transduction pathway is conserved in all land plants (Paponov *et al.*, 2009; Flores-  
36 Sandoval *et al.*, 2015; Thelander *et al.*, 2018; Cancé *et al.*, 2022). In the model moss *Physcomitrella*  
37 (*Physcomitrium patens*), the main auxin biosynthesis pathway is, as in *Arabidopsis*, the conversion of  
38 tryptophan by TAR enzymes to indole-3-pyruvate (IPyA) from where it is converted by YUC enzymes  
39 into active auxin (indole-3-acetic acid, IAA) (Landberg *et al.*, 2020). Auxin homeostasis plays an  
40 important role during the life cycle of *Physcomitrella*, maintaining growth and organogenesis (Ludwig-  
41 Müller *et al.*, 2009; Thelander *et al.*, 2018). However, there is no indication for a polar auxin transport  
42 in the moss shoot (Fujita *et al.*, 2008), although the protein family responsible for polar auxin transport,  
43 Pin-formed (PIN), is conserved in all land plants, including bryophytes (Bennett *et al.*, 2014a; Zhang *et*  
44 *al.*, 2020).

45 Canonical PIN proteins share four highly conserved motifs in the hydrophilic loop and a strong  
46 conservation in the N'- and C' terminal transmembrane regions, while noncanonical PINs are defined  
47 by a higher variability (Bennett *et al.*, 2014a). Structures and mechanism of auxin transport have recently  
48 been elucidated in great detail for the *Arabidopsis thaliana* PIN8 protein (Ung *et al.*, 2022). The  
49 *Physcomitrella* genome encodes four PIN genes, the three canonical *PpPINA*, *PpPINB* and *PpPINC*,  
50 and the noncanonical *PpPIND*, with *PpPINA* and *PpPINB* being the most similar to each other (Bennett  
51 *et al.*, 2014b). The *Physcomitrella* PIN proteins form an outgroup with other bryophytes to vascular  
52 plants and lycophytes, where the canonical PpPINs cluster with PIN proteins from other mosses, while  
53 the noncanonical PpPIND is separated together with several PIN proteins of the liverwort *Marchantia*  
54 *polymorpha* (Bennett *et al.*, 2014a).

55 In the gametophore, apical stem cells show the highest expression of *PpTAR* genes, indicating  
56 biosynthesis of IPyA (Landberg *et al.*, 2020), with auxin accumulating beneath the stem apex and at the  
57 stem base (Bierfreund *et al.*, 2003; Fujita *et al.*, 2008). The growth of developing leaves (phylloids) in  
58 *Physcomitrella* is marked by high auxin activity (Thelander *et al.*, 2019) with all three canonical *PpPIN*  
59 genes being active (Viaene *et al.*, 2014). While *PpPINA* is the highest expressed *PIN* gene in  
60 *Physcomitrella* tissues, *PpPINC* has the lowest expression level of all canonical PINs (Bennett *et al.*,  
61 2014b). Single knockouts of *PpPIN* genes have no severe effect on gametophore growth (Viaene *et al.*,  
62 2014), while the double knockout of *PpPINA* and *PpPINB* leads to elongated leaves, a phenotype similar  
63 to *Physcomitrella* gametophores treated with excess auxin or auxin transport inhibitors (Decker *et al.*,  
64 2006; Bennett *et al.*, 2014b).

65 When introduced to short day conditions with low temperatures, the monoecious moss *Physcomitrella*  
66 initiates the formation of sexual organs on the gametophore apex (Hohe *et al.*, 2002) with specialized  
67 stem cells for female archegonia and male antheridia development (Kofuji & Hasebe, 2014). Growth of  
68 antheridia and archegonia is highly synchronized, beginning with the formation of the antheridia while

69 archegonia develop later but mature faster, so that self-fertilization is possible (Cove, 2005; Landberg  
70 *et al.*, 2013). The development and growth of gametangia is controlled by the auxin-biosynthesis  
71 regulators *SHORT INTERNODE/STYLISH (SHI/STY)* and *TAR* enzymes, influencing the neck length  
72 of archegonia and growth of antheridia. During the growth of antheridia, the expression of *PpSHI* and  
73 *PpTAR* genes overlap with the expression of *PpPINA* and the accumulation of auxin in apical cells,  
74 before spermatogenesis begins. This activity slowly declines and reaches its lowest point during  
75 spermatogenesis, indicating a process where auxin plays a minor role (Landberg *et al.*, 2013; Landberg  
76 *et al.*, 2020). Spermatogenesis in *Physcomitrella* is tightly regulated, producing motile, biflagellate  
77 sperm cells, relying on the availability of water to swim to the egg cell (Reski, 1998; Cove, 2005; Ortiz-  
78 Ramírez *et al.*, 2017; Koshimizu *et al.*, 2018; Gu *et al.*, 2022). Like in antheridia, the activity of auxin  
79 biosynthesis, signalling and accumulation are the highest in archegonia during early growth phases. The  
80 precursor egg cell and apical neck cells show the highest activity, while there is a minimum of expression  
81 during egg maturation (Landberg *et al.*, 2013; Landberg *et al.*, 2020). After fertilization of the egg cell,  
82 a diploid embryo grows from the zygote and develops into the moss sporophyte (Horst *et al.*, 2016). The  
83 sporophyte in *Physcomitrella* is reduced compared to other mosses (Kirbis *et al.*, 2020), even within its  
84 own family (Ostendorf *et al.*, 2021), and consists of the sporophyte foot, a short seta and the spore  
85 capsule, which rips open after maturation to release the spores (Cove, 2005). Auxin is distributed  
86 dynamically in a polar manner during sporophyte growth, with an auxin maximum in the apex of the  
87 early embryo which later localizes to the foot of the young sporophyte where it slowly recedes during  
88 maturation (Fujita *et al.*, 2008). The sporophyte foot is secured in a maternal cavity (vaginula) and  
89 covered at its base with haustorial cells, important for the uptake of nutrients provided by the  
90 gametophore (Regmi *et al.*, 2017). Formation of sporophytes is a complex process and regulated by a  
91 number of genetic elements (Mosquna *et al.*, 2009; Horst *et al.*, 2016; Ortiz-Ramírez *et al.*, 2016; Lopez-  
92 Obando *et al.*, 2016; Hashida *et al.*, 2020; Kirbis *et al.*, 2020; Sakakibara *et al.*, 2008; Takechi *et al.*,  
93 2021, Landberg *et al.* 2022). However, auxin remains a crucial player in sporophyte growth (Fujita *et al.*,  
94 2008), with the two *Physcomitrella PIN* genes *PpPINA* and *PpPINB* showing functional activity in  
95 the development of sporophytes (Bennett *et al.*, 2014b), whereas the role of the canonical *PpPINC*  
96 remains unclear.

97 Here, we elucidate the role of *PpPINC* in the *Physcomitrella* life cycle. We found that *PpPINC*  
98 influences spermatogenesis-related gene expression, controls motility and phenotype of moss sperm  
99 cells, and is important in preventing early abortion of premeiotic sporophytes, while it has no obvious  
100 role in vegetative growth.

101

## 102 **Material and Methods**

### 103 **Plant material and culture conditions**

104 The *Physcomitrella patens* (Hedw.) Bruch & Schimp. ecotype Gransden covers several laboratory  
105 strains which are descendants of the first original cultivated single clone (Haas *et al.*, 2020) and was  
106 recently renamed to *Physcomitrium patens* (Hedw.) Mitt.. We used as wild type (WT) a fertile Gransden  
107 line, which underwent sexual reproduction regularly as a basis for all transgenic lines. Plants were  
108 cultivated using Knop medium (pH 5.8) according to Reski & Abel (1985) containing microelements  
109 according to Egner *et al.* (2002). For solid medium, 12 g/l agar (OXOID, Thermo Scientific) were  
110 added. Standard growth conditions were long day 16 hours light with  $70\pm 5 \mu\text{mol m}^{-2} \text{s}^{-2}$  and 22°C.  
111 Sporophyte induction was modified after Hohe *et al.* (2002). Plants were grown in long day conditions,  
112 before being transferred to sporophyte inducing conditions (Hohe *et al.*, 2002). At day 18 of sporophyte  
113 induction, plants were watered (H<sub>2</sub>O dest., 10 ml for 9 cm petri dish), which was removed from the plate  
114 at day 25. All moss lines used are stored in the International Moss Stock Center (IMSC;  
115 <https://www.moss-stock-center.org>) with the following accession numbers: *PinCPromCit* = 40917,  
116 *pinC#10* = 40918, *pinC#29* = 40919, *pinC#69* = 40420, WT = 40095.

### 117 **Generation of transgenic lines**

118 Transgenic lines were created via highly efficient homologous recombination (Reinhard *et al.*, 2004) in  
119 transformed protoplasts (Hohe & Reski, 2002). For the generation of targeted *pinC* mutants the region  
120 upstream from the beginning of the first exon to the untranslated region after exon six was amplified  
121 (2915 bp) from genomic DNA using the following primers: P3-KO Fw + P3-KO Rv (Supp. Tab. 1). The  
122 amplified fragment was sub-cloned into the vector *pJET1.2*. Using *SacI* and *NcoI* a piece of the *PpPINC*  
123 gene (1696 bp) was replaced with a sulfadiazine selection cassette (Parsons *et al.*, 2012). For the  
124 generation of the reporter line, 2.1 kb upstream of the start codon of the *PpPINC* gene were fused to the  
125 citrine cds and nos terminator via Gibson cloning (Gibson *et al.*, 2009), upper case letters are for *PpPINC*  
126 promoter amplification: 5PinCprom\_f+CA5 + 3PinCprom\_r+Citrin (Supp. Tab. 1). The expression  
127 cassette was cloned between homologous regions of the carbonic anhydrase locus (Wiedemann *et al.*,  
128 2018), erasing the citrine expression of the parental plant when correctly integrated into the genome.

### 129 **Molecular analysis of transgenic lines**

130 Initial screening of lines was done with leaflet PCR, according to Schween *et al.* (2002), to test for the  
131 presence of the construct. For RT-PCR total RNA was extracted from 6 weeks old gametophores, 21  
132 days after the sporophyte induction started using the innuPREP Plant RNA Kit (Analytik Jena AG, Jena,  
133 Germany) and reversely transcribed using oligo-d(T)<sub>16</sub> primers with Superscript III reverse  
134 transcriptase (Life Technologies, Thermo Fisher Scientific). Analysis for the absence of *PpPINC* RNA  
135 was performed with the gene-specific primers Pin3f\_ex1-2 + Pin3r\_ex2 (Supp. Tab. 1). Presence of  
136 cDNA was tested with C45\_fwd and C45\_rev (Supp. Tab. 1) amplifying the constitutively expressed  
137 gene L21. Transgene copy numbers were tested via quantitative Real-Time PCR according to Noy-  
138 Malka *et al.* (2014). Genomic DNA was isolated from protonema, one week after the last tissue  
139 disruption using the innuPREP Plant DNA Kit (Analytic Jena AG). Transgene copy numbers were

140 determined comparing relative values of the transgene 35S promoter (35SPqPCR\_f + 35SPqPCR\_r;  
141 Supplemental Table 1) with the single copy transgene carbonic anhydrase line used in Wiedemann *et*  
142 *al.* (2018), for normalization, the single copy gene CLF was used (Noy-Malka *et al.*, 2014).

### 143 **Tissue isolation for gene expression analysis using SMARTseq**

144 Triplicates of tissue samples were collected 18 days after gametophores were exposed to sporophyte-  
145 inducing conditions. Mature archegonia and antheridia were collected manually using a stereoscope  
146 (Olympus SZX7) and stored directly in TRIzol® (Fisher Scientific GmbH, Schwerte, Germany). All  
147 lines used were grown together on the same plate. For each sample eight archegonia or antheridia were  
148 collected. Tissues were homogenized using small pistils and mixed with chloroform. The aqueous phase  
149 was then further processed using the Direct-zol RNA Microprep Kit (Zymo Research Europe GmbH,  
150 Freiburg, Germany). The resulting RNA was treated with RiboLock RNase Inhibitor (Fisher Scientific  
151 GmbH, Schwerte, Germany). The cDNA library was created at the Genomics Unit in the Instituto  
152 Gulbenkian de Ciencia, Portugal according to Picelli *et al.* (2014). Libraries were sequenced using the  
153 Illumina RNASeq platform from Novogene (Novogene Company Limited, Cambridge, UK).

### 154 **Transcriptomic data processing**

155 Raw data was trimmed using Trim Galore (Version 0.6.6; adapter stringency = 1 bp; minimum required  
156 sequence length for retaining a read pair = 20 bp; 3'clipping = 1 bp). All further steps were done using  
157 the Galaxy platform (Afgan *et al.*, 2018). The 150 bp paired-end reads were then mapped to the  
158 *Physcomitrella* genome version 3.3 (downloaded from Phytozome (Goodstein *et al.*, 2012) using  
159 HISAT2 (Galaxy Version 2.1.0; spliced alignment activated). Mapped reads were counted with feature  
160 counts (Galaxy Version 2.0.1; excluding chimeric fragments; only fragments with both reads aligned,  
161 GFF feature type filter = CDS; GFF gene identifier = gene\_id). Differential gene expression was  
162 analyzed using DESeq2 (Galaxy Version 2.11.40.6+galaxy1) and filtered for enriched gene ontology  
163 terms with GOEnrichment (Galaxy Version 2.0.1). Quality of mapping and read counts were controlled  
164 with MultiQC (Galaxy Version 1.11+galaxy0) and FastQC (Galaxy Version 0.73+galaxy0).

### 165 **Calcium measurement in sperm cells**

166 Sperm packets of single antheridia where extracted directly after being released from the antheridium  
167 and spotted on polylysine-covered glass slides according to Horst & Reski (2017). Sperm cells where  
168 incubated in a Fluo-4 solution according to Ortiz-Ramírez *et al.* (2017) for 20 minutes, photographed  
169 (see microscopy) and pictures were then analyzed using ImageJ (Schneider *et al.*, 2012).

### 170 **Sporophyte count**

171 For all lines we analyzed all gametophores on the respective plate. After removal of the leaves,  
172 sporophytes, embryos, empty vaginulae and aborted sporophytes were counted.

## 173 **Statistical analysis**

174 Stem length, leaf length and leaf width were tested with Student's t-Test with  $p < 0.05$ . Significance of  
175 motility was assessed with one-sided ANOVA and Tukey-Kramer test, flagellar phenotype with one-  
176 sided ANOVA. All tests were performed with Microsoft Excel and the XLMiner Analysis ToolPak.

## 177 **Protein alignments and motif analysis**

178 Needleman-Wunsch (Needleman & Wunsch, 1970) and multiple sequence alignments (Larkin *et al.*,  
179 2007) with Clustal Omega (1.2.4) were performed using the European Bioinformatics Institute (EMBL-  
180 EBI) web tools (<https://www.ebi.ac.uk/services>) (Madeira *et al.*, 2019). Needleman-Wunsch alignments  
181 were performed with BLOSUM62, a gap penalty of 10 and extend penalty of 0.5. Multiple sequence  
182 alignments were performed with default settings. Transmembrane protein motifs were assessed using  
183 TMHMM 2.0 (Krogh *et al.*, 2001; Sonnhammer *et al.*, 1998).

## 184 **Flow cytometry**

185 Flow cytometry analysis was performed according to Heck *et al.* (2021).

## 186 **Microscopy**

187 For preparation of samples, we used an Olympus SZX7 stereoscope and for extraction of sperm  
188 packages a Zeiss Axiovert microscope. Fluorescence and bright-field microscopy pictures were taken  
189 with a Zeiss AxioPlan 100 with a Zeiss MRC5 camera and Zeiss AxioVision software (Version 3.8.2).

190

## 191 **Results**

### 192 **Physcomitrella PIN family**

193 The *Physcomitrella* genome (Lang *et al.*, 2018) encodes three canonical PIN proteins, PpPINA  
194 (Pp3c23\_10200), PpPINB (Pp3c24\_2970) and PpPINC (Pp3c10\_24880). These genes are similar in  
195 structure and length (Supplemental Fig. S1 a), consisting like all canonical PIN proteins in land plants  
196 of two transmembrane regions (five helices each), separated by a hydrophilic loop (Supplemental Fig.  
197 S1 b). The transmembrane regions have the same length in all three proteins, whereas the hydrophilic  
198 loop of PpPINC is 15 amino acids (AA) shorter than those of PpPINA and PpPINB (Table 1,  
199 Supplemental Fig. S1 b). While PpPINA and PpPINB are very similar in their AA sequences, PpPINC  
200 differs more, especially in the hydrophilic loop (Supplemental Fig. S2 a, c). While PpPINA and PpPINB  
201 share a sequence identity above 86 %, for PpPINC it is below 65% compared to the others (Table 1,  
202 Supplemental Fig. S2b). We hypothesise that PpPINA and PpPINB are the result of a gene duplication  
203 event in the recent genomic history of *Physcomitrella* (Lang *et al.*, 2018), after the event that led to  
204 PpPINC.

205 Compared to the canonical PIN proteins of Arabidopsis (AtPIN1,2,3,4,7), the hydrophilic loop of  
206 Physcomitrella PINs are between 51 and 97 AA longer, while there is strong conservation in the  
207 transmembrane regions (Supplemental Fig. S2b), as there is among all land plants (Bennett *et al.*, 2014a;  
208 Zhang *et al.*, 2020).

209 **Table 1:** Identity, similarity and length of Physcomitrella PpPIN protein motifs

|       | A vs B                          | A vs C    | B vs C    | PpPINA    | PpPINB | PpPINC |
|-------|---------------------------------|-----------|-----------|-----------|--------|--------|
|       | Identity; Similarity of AA in % |           |           | Length AA |        |        |
| TM N' | 96.1;98.7                       | 87.7;93.5 | 88.4;93.5 | 155       | 155    | 155    |
| HL    | 86.3;91.4                       | 64.7;76.9 | 64.4;76.8 | 409       | 409    | 394    |
| TM C' | 95.3;98.7                       | 80.0;88.0 | 77.3;86.7 | 150       | 150    | 150    |

210

211 A = PpPINA, B = PpPINB, C= PpPINC, TM N' = N-terminal transmembrane region, HL = Hydrophilic  
212 loop, TM C'=C-terminal transmembrane region.

213

#### 214 **Stage-specific expression of *PpPINC***

215 We compared *PpPIN* expression in publicly available expression data (PEATmoss database; Fernandez-  
216 Pozo *et al.*, 2020) for the two Physcomitrella ecotypes Gransden and Reute in two or three datasets,  
217 respectively (Hiss *et al.*, 2014; Ortiz-Ramírez *et al.*, 2016; Perroud *et al.*, 2018). As reported in Bennett  
218 *et al.* (2014b), *PpPINA* is the highest expressed gene of the three, followed by *PpPINB* with lower, but  
219 similar expression rates. Consistent across the three data sets, *PpPINC* is the lowest expressed of the  
220 three. While there are some differences in the expression in single tissues in the different data sets, the  
221 overall expression of *PIN* genes in both Physcomitrella ecotypes is very similar. In protonema, the  
222 expression of all three *PINs* is the lowest, while the highest expression of *PpPINA* and *PpPINB* can be  
223 found in gametophores and developing sporophytes. For *PpPINC*, the expression in vegetative tissues  
224 is very low, while there is a dynamic expression during sporophyte development in both ecotypes, which  
225 is nonetheless lower compared to the other two *PINs* in the same sporophytic tissues (Supplemental Fig.  
226 S3).

227 For a closer look at the activity of PpPINC, we created a moss line expressing citrine (*pinCPromCit*)  
228 under the influence of the native *PpPINC* promoter region (2.1 kb upstream CDS start). This construct  
229 was targeted to the carbonic anhydrase-citrine tagged locus used in Wiedemann *et al.* (2018), because  
230 of the high expression of the carbonic anhydrase gene. We screened for altered citrine signals in  
231 transformed plants compared to the ever-present citrine expression of the parental line and thus  
232 recovered a line with targeted integration of the *pinCPromCit* construct (Supplemental Fig. S4a, b).  
233 Under standard growth conditions we did not observe any *PINC*-driven citrine fluorescence, neither in

234 protonemal cells, rhizoids, stems, nor in adult leaves (Fig. 1a). In contrast, citrine fluorescence was  
235 clearly visible in the apices of young leaves. From here, fluorescence proceeds towards the base until  
236 maturation of the leaf. Intriguingly, *PpPINC* expression was highest in parts of the mid-rip and in leaf  
237 margins (Fig. 1b, c).

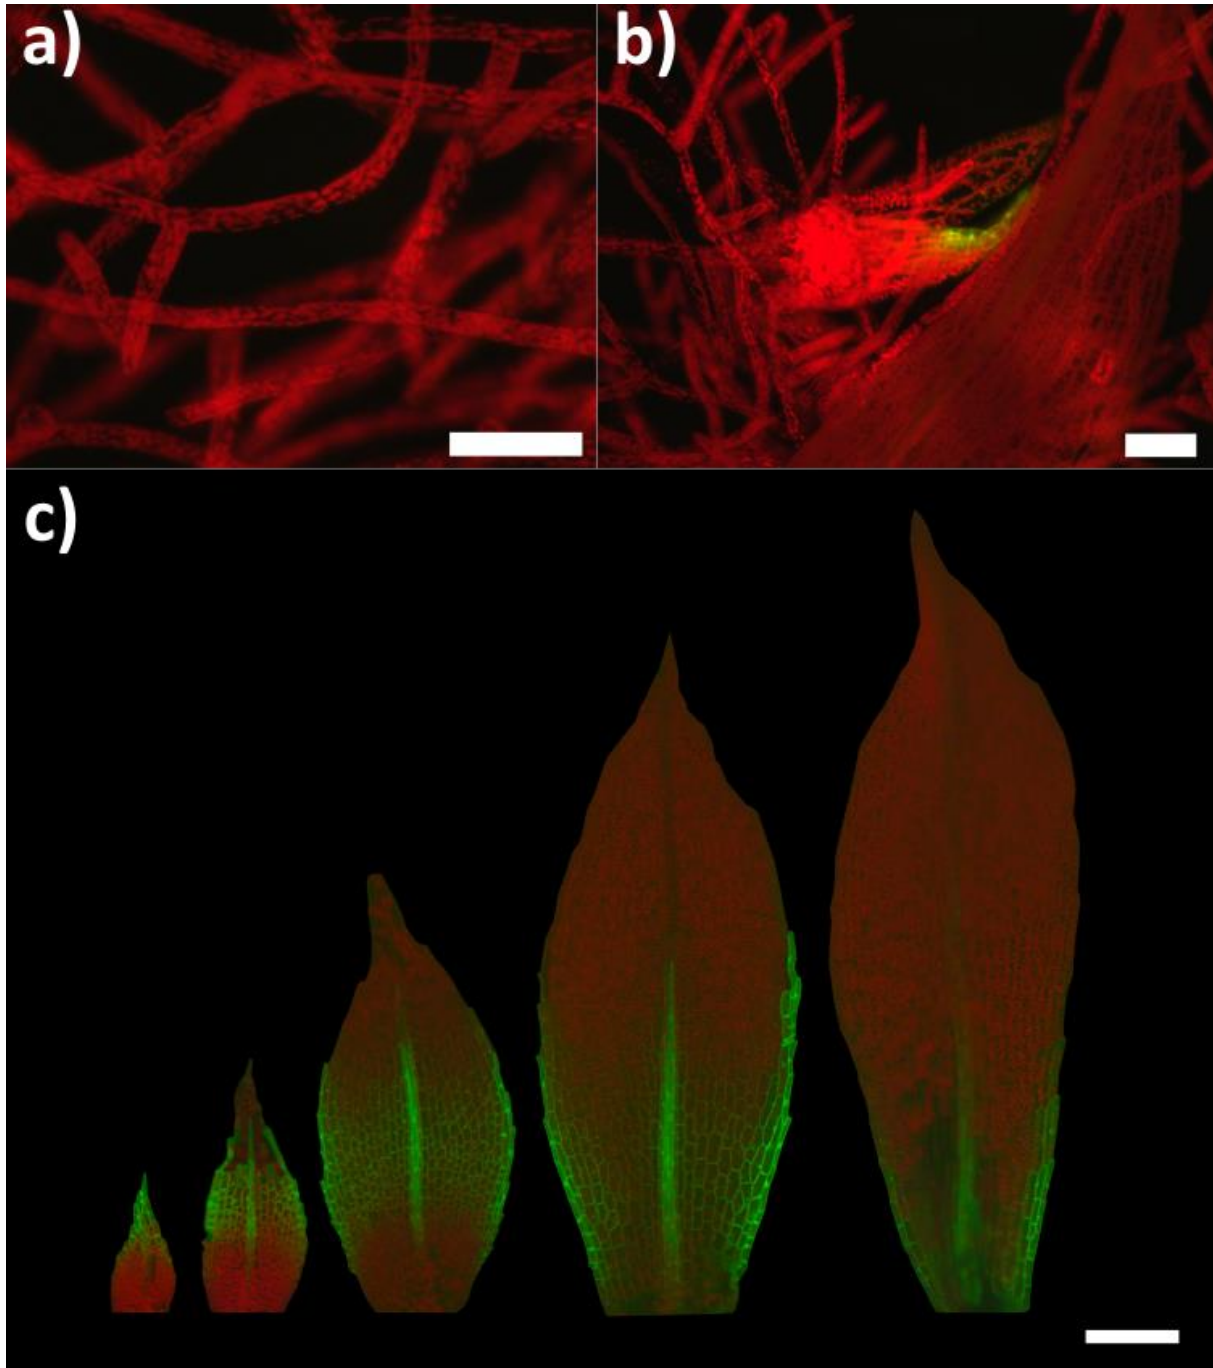

238

239 **Figure 1: *PpPINC* is expressed in developing leaves of *Physcomitrella*.** Fluorescence microscopy to  
240 visualize citrine expression in a *PpPINC* promoter line (green). Red marks autofluorescence of  
241 chlorophyll: a) protonema (bar = 100  $\mu$ m) b) budding gametophore (bar = 100  $\mu$ m) c) the youngest  
242 leaves of a moss gametophore (bar = 200  $\mu$ m).



243 In addition, citrine expression was detectable in developing gametangia. In mature antheridia close to  
244 releasing their sperm cells (antheridium stage 9 in Landberg *et al.* (2013)), the signal was found in the  
245 foot cells separating the antheridial body from the gametophore apex (Fig. 2a). In archegonia, a citrine  
246 signal was visible only after the neck canal had opened, surrounding the transition zone between canal  
247 and archegonial body above the egg cell (Fig. 2b).

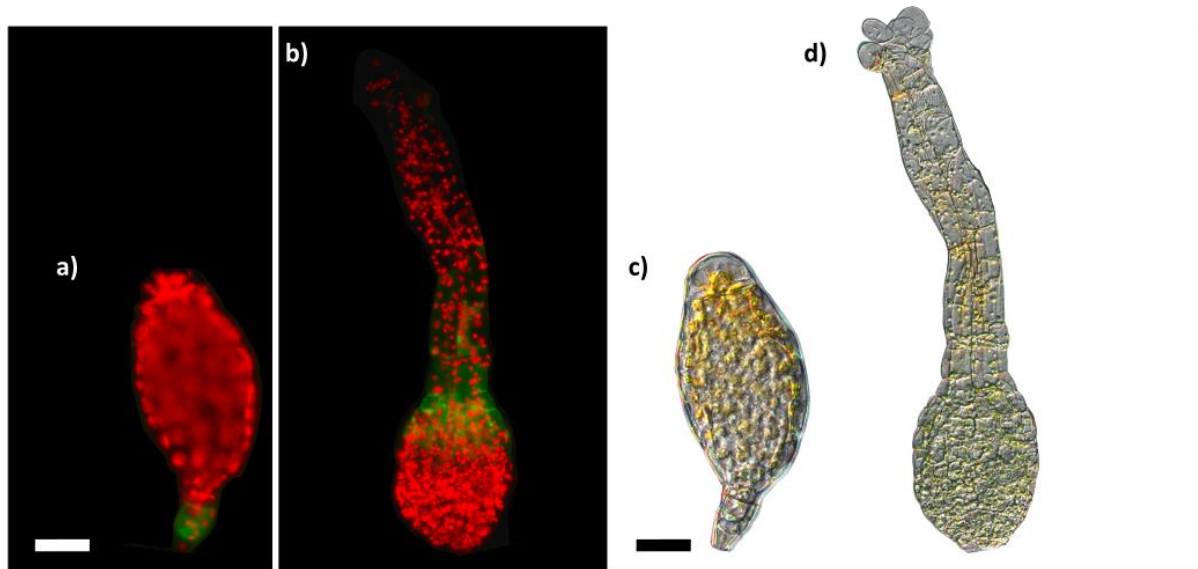

248

249 **Figure 2: In *Physcomitrella*, *PpPINC* is dynamically expressed in reproductive organs.** With  
250 fluorescence-microscopy we visualized citrine expression in a *PpPINC* promoter line (green). Red  
251 marks autofluorescence of chlorophyll: a) and c) mature antheridium shortly before sperm cells are  
252 released (scale bar = 25  $\mu$ m). Sperm cells can be seen inside the antheridium in c). b) and d) mature and  
253 opened archegonium (scale bar = 50  $\mu$ m).

254

### 255 **Vegetative growth is unaltered in *pinC* mutant**

256 To understand the role of *PpPINC* in the *Physcomitrella* life cycle, we created targeted knockout mutants  
257 via homologous recombination in the background of a fertile *Physcomitrella* WT. Out of 12 targeted  
258 mutant lines devoid of *PpPINC* expression, three independent, haploid mutant lines (*pinC*#10, *pinC*#29,  
259 *pinC*#69) with single integration of the knockout construct in the genome were chosen for further  
260 analysis (Supplemental Fig. S5). On solid medium we could not detect obvious phenotypic differences  
261 to WT regarding stem length, leaf length and leaf width as well as overall growth (Supplemental Fig.  
262 S6).

### 263 **Altered sperm motility and phenotype in *pinC* mutants**

264 When WT and *pinC* mutants were grown in gametangia-inducing conditions, i.e. 15° C and short day  
265 (Hohe *et al.*, 2002), male and female gametangia developed without any observable differences.

266 However, we detected an increased motility of *pinC* mutant sperm cells (spermatozoids). In WT,  $38.9 \pm$   
267  $1$  % of spermatozoids are motile 5 minutes after release from the opened antheridium. All three *pinC*  
268 mutant lines showed a significantly increased motility ( $p < 0.00001$ ) of more than 60 % compared to  
269 WT ( $pinC\#10 = 64.8 \pm 2.75$  %,  $pinC\#29 = 63.8 \pm 1.51$  %,  $pinC\#69 = 62.3 \pm 2.32$  %) (Fig. 3a, b, c). For  
270 a deeper analysis we focused on the line *pinC*#29. When looking closer at the phenotype of the  
271 spermatozoids we observed that a majority of WT spermatozoids have coiled flagella ( $59.8 \pm 11.96$  %  
272 coiled) (Fig. 3d, g, h), while in the mutant *pinC*#29 the vast majority of spermatozoids have non-coiled  
273 flagella ( $94.48 \pm 5.22$  %) (Fig. 3e, f). It was shown by Ortiz-Ramírez *et al.* (2017) that calcium  
274 concentration in *Physcomitrella* sperm cells can alter their motility. However, staining with the calcium-  
275 sensitive dye Fluo-4 did not reveal differences in calcium concentrations inside the sperms of WT and  
276 mutant *pinC*#29 (Supplemental Fig. S7).

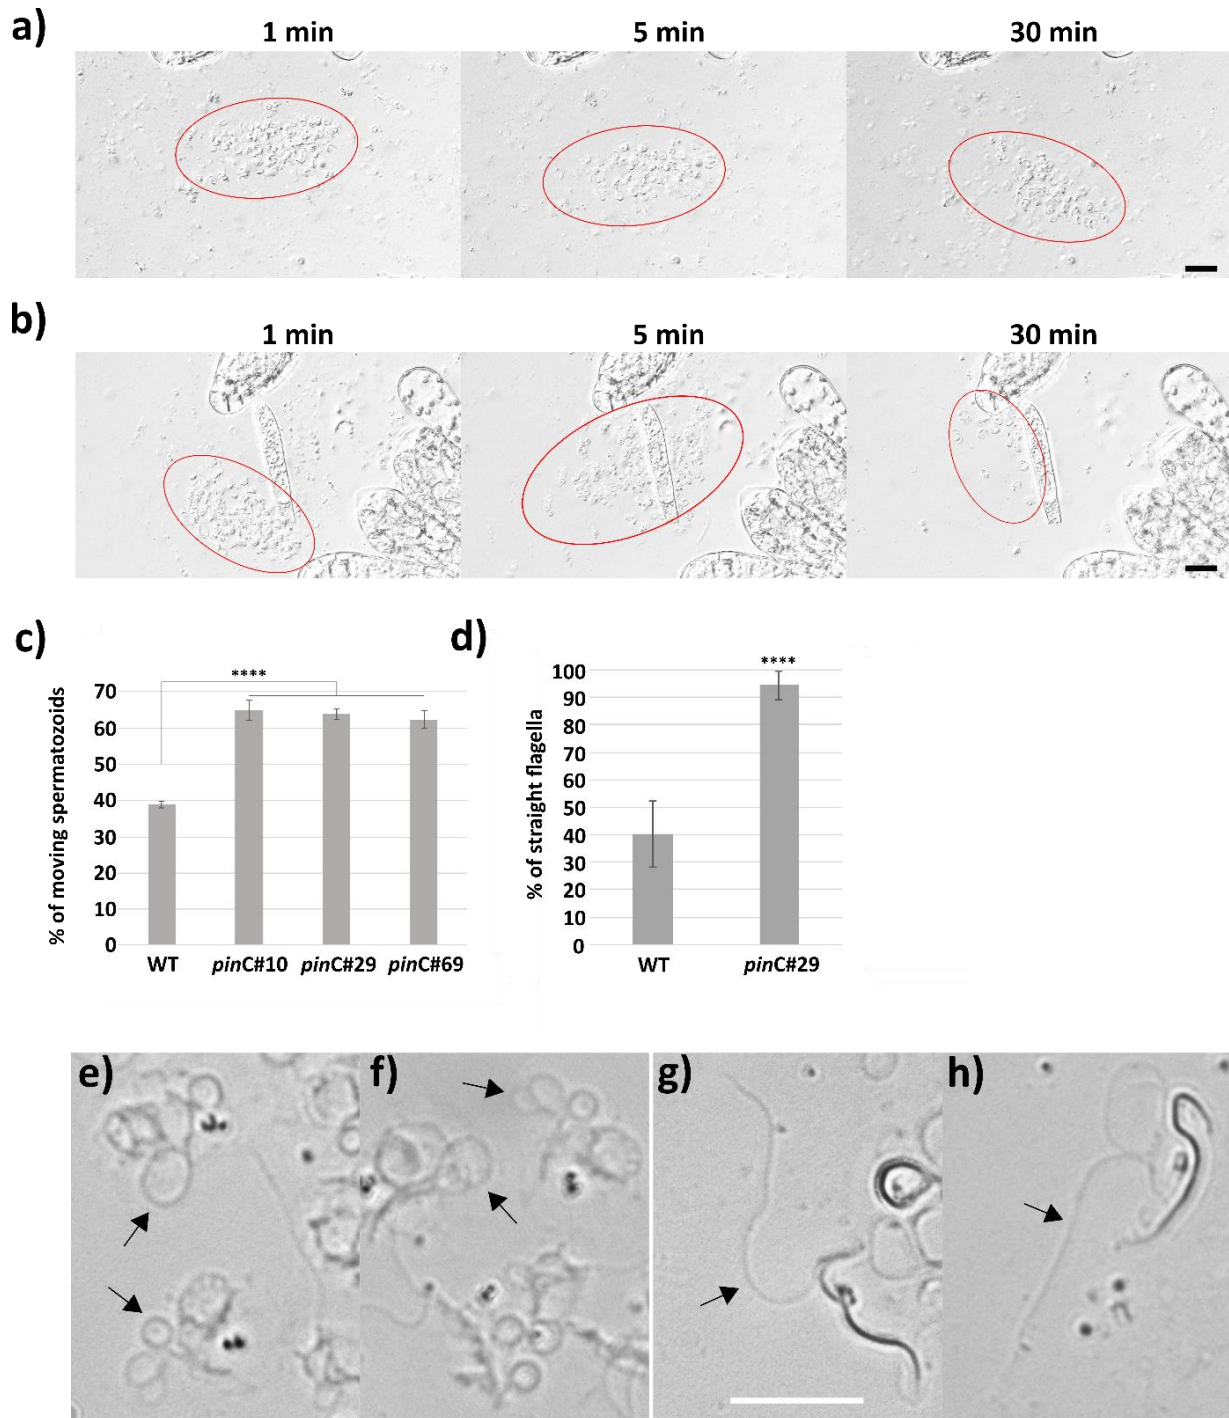

277

278 **Figure 3: Sperm morphology and motility in *Physcomitrella* WT and *pinC* mutants.** Mutant sperm  
279 cells are more motile and have less coiled flagella compared to WT sperm cells. a) WT and b) *pinC#29*  
280 spermatozooids one, five and 30 minutes after being released from a single antheridium, respectively (bar  
281 = 20  $\mu$ m). Areas circled in red highlight spermatozooids after release. c) Percentage of moving  
282 spermatozooids after being released from the antheridium (n = 10). d) Percentage of non-coiled flagella  
283 compared to coiled flagella (WT: n = 7 antheridia, *pinC#29*: n = 9 antheridia). Asterisks in c) and d) =  
284  $p \leq 0.0001$ . e) and f) WT spermatozooids with coiled flagella marked by arrows. g) and h) *pinC#29*

285 spermatozooids with non-coiled flagella marked by arrows. e) – h) bar = 10  $\mu$ m. For better resolution of  
286 sperm cells pictures in a, b, e-h are stacked pictures.

287

## 288 **Organ-specific differential gene expression**

289 To identify genes underlying the differences in sperm flagella phenotype, we performed RNAseq  
290 analysis on WT and mutant gametangia. For this we collected mature archegonia and antheridia from  
291 WT and the *pinC#29* mutant, cultivated on the same plate, 20 days after start of sporophyte induction.  
292 For each line and organ, we pooled eight gametangia per sample which were collected on three different  
293 occasions (three samples per organ and line). Mapping of sequenced samples resulted in alignment rates  
294 of 71.8 – 93.8 % with the version 3.3 of the *Physcomitrella* genome (Lang *et al.*, 2018). With 150 bp  
295 paired-end Illumina platform-based sequencing, we reached read counts between 19 and 39.8 million  
296 for the feature coding sequence (CDS) (Supplemental Fig. S8). No reads could be mapped to the deleted  
297 area of *PpPINC* in the mutant line *pinC#29*, which confirms the efficient gene knockout (Supplemental  
298 Fig. S9). Between all mutant and all WT samples, we could not find significant differences in gene  
299 expression. In contrast, we found a clear separation between male and female gametangia, while the  
300 difference between WT and *pinC* mutant was not strong (Fig. 4a). When comparing the samples to each  
301 other, we found that for the male samples (WT antheridia WM vs mutant antheridia PM) there were two  
302 upregulated (*Pp3c26\_6020*, *Pp3c26\_3990*) and nine downregulated genes (*Pp3c9\_8920*, *Pp3c14\_8940*,  
303 *Pp3c20\_22670*, *Pp3c1\_22810*, *Pp3c19\_15670*, *Pp3c3\_4950*, *Pp3c3\_11110*, *Pp3c21\_8410*,  
304 *Pp3c12\_11710*) ( $p \leq 0.05$ , Fold change (FC)  $> \pm 2$ , Table 2) (Supplemental Table 2a). Three of the  
305 downregulated genes are not annotated so far, while the other genes show counts only in a local part of  
306 the gene or exhibit obscure gene structures consisting of only one exon or 22 micro exons. Comparing  
307 the female samples, we found one upregulated (*Pp3c11\_4360*) and two downregulated (*Pp3c7\_8820*,  
308 *Pp3c6\_26100*) genes (Supplemental Table 2b), while these genes also show expression only in one part  
309 of the gene or show unusual gene structures. When comparing samples derived from antheridia against  
310 archegonia, we observed a strong upregulation of genes in male gametangia of both lines. The ratio of  
311 upregulated to downregulated genes is higher than 4. The highest number of upregulated genes was  
312 found in the comparison between all male and all female samples with 1920 genes upregulated and 397  
313 downregulated genes (Table 2). The results of all DEG experiments are compiled in Supplemental Table  
314 3.

315 **Table 2:** Up- and downregulated genes in male (M) and female (F) tissue samples from *Physcomitrella*  
316 WT (W) and *pinC#29* (P).

|          | Upregulated genes | Downregulated genes |
|----------|-------------------|---------------------|
| PM vs WM | 2                 | 9                   |
| PF vs WF | 1                 | 2                   |

|                             |      |     |
|-----------------------------|------|-----|
| <b><i>pinC#29</i> vs WT</b> | 0    | 0   |
| <b>PM vs PF</b>             | 1361 | 245 |
| <b>WM vs WF</b>             | 1323 | 298 |
| <b>Male vs Female</b>       | 1920 | 397 |

317

318 We analysed the gene ontology (GO) terms of the differentially expressed genes (DEGs) to look for  
319 accumulation of specific terms for all experiments (p-value cut off 0.01) but could find enriched terms  
320 only in the comparisons between sexes (Fig. 4b), we also found GO enrichment in the upregulated genes  
321 only. For the comparison of WT antheridia against WT archegonia (WM vs WF) we found a weak  
322 enrichment of the GO term axonemal dynein complex (0.08 %). In the experiment PM vs PF (mutant  
323 antheridia vs mutant archegonia) we found that five GO terms were most prominent in the upregulated  
324 genes, three of them can be associated with spermatogenesis and one each with energy consumption and  
325 DNA synthesis (Cellular Components: cilium = 0.36 %, microtubule organizing center = 0.23 %;  
326 Biological Process: carbohydrate catabolic process = 7.2 %, cilium assembly = 1.3 %, purine  
327 ribonucleotide metabolic process = 7%). The same is true for the comparison of all antheridia samples  
328 with all archegonia samples, where four GO terms associated with spermatogenesis were  
329 overrepresented (Cellular Components: cilium = 3.9 %, dynein complex = 2.2 %, intraciliary transport  
330 particle B = 0.84 %; Biological Process: cell projection organization = 1.3 %) (Supplemental Table 1).  
331 Most of the upregulated DEGs found in the comparison of the sexes were shared between WT and  
332 mutant (Fig. 4c). The number of DEGs found exclusively in the mutant was similar between upregulated  
333 and downregulated genes (119 / 117). The WT shared the least downregulated genes with the mutant,  
334 while contributing more downregulated DEGs to the comparison between male and female (Fig. 4d).  
335 We identified some single DEGs, which had been reported to play roles in flagella formation or auxin  
336 homeostasis. The coiled coil-like protein *Ppccdc39* (Meyberg *et al.*, 2020) was upregulated almost 3-  
337 fold (FC) in male samples compared to female ones (FC = 2.98). While it is also significantly  
338 upregulated in the comparison of WT male against female gametangia (FC = 2.4, p = 0.0005), the fold  
339 change was even larger in the mutant samples, but due to high variation in the male samples not  
340 statistically significant. The *arl13b* homologue *Pp3c1\_40600*, which is involved in flagella stability, was  
341 significantly upregulated in the comparison of male against female gametangia (FC = 3.44, p = 0.025),  
342 which is also upregulated in the Reute ecotype compared to Gransden (Meyberg *et al.*, 2020). In all  
343 comparisons of male against female tissues the arabinogalactan 31 homologue *Pp3c5\_9210*, found to  
344 be active during spermatogenesis (Meyberg *et al.*, 2020), was upregulated with a higher fold change in  
345 PM vs PF (FC = 7.24, p = 2.06E-10) than in WM vs WF (FC = 4.62, p = 1.20E-07) (male vs female FC  
346 = 5.34, p = 1.61E-08). We could also find that *PpBELL2* (Horst *et al.*, 2016) was significantly  
347 downregulated in all male samples compared to female samples (PM vs PF: FC = -7.53, p = 8.17E-09;  
348 WM vs WF: FC = -3.07, p = 0.013, male vs female: FC = -3.85, p = 0.0029). The two PHD clade IIa  
349 genes *PpMS1A* and *PpMS1B*, are significantly higher expressed in male tissues compared to female

350 (*PpMSIA*: Male vs Female FC = 2.35, p = 0.029, *PpMSIB*: Male vs Female FC = 2.81, p = 0.036, WM  
351 vs WF FC = 2.04, p = 0.035), as it was also reported in Landberg *et al.* (2022). While not being  
352 differentially expressed, we observed expression of all six *PpTAR* genes in both gametangia, with  
353 *PpTARB* being the highest expressed, followed by *PpTARA* and *PpTARC*, while *PpTARE* and *PpTARF*  
354 being lower expressed and *PpTARD* the lowest of all six genes. We could also find higher expression  
355 levels of the two *PpYUCB* and *PpYUCF* in both gametangia, while *PpYUCD* showed a very low, but  
356 significantly upregulated expression in archegonia. This indicates active auxin synthesis in mature  
357 gametangia. While our transcriptomic data reveal trends in general gene expression, we could not  
358 identify any single DEG which could be responsible for the difference in sperm flagella phenotype in  
359 the comparison of WT and the mutant.

360

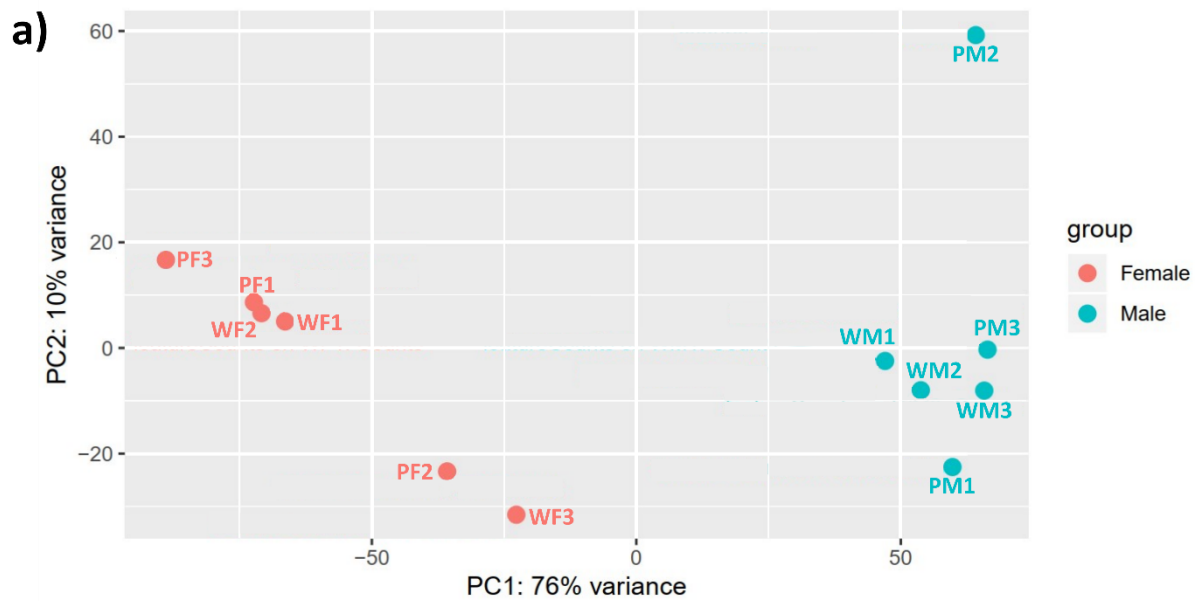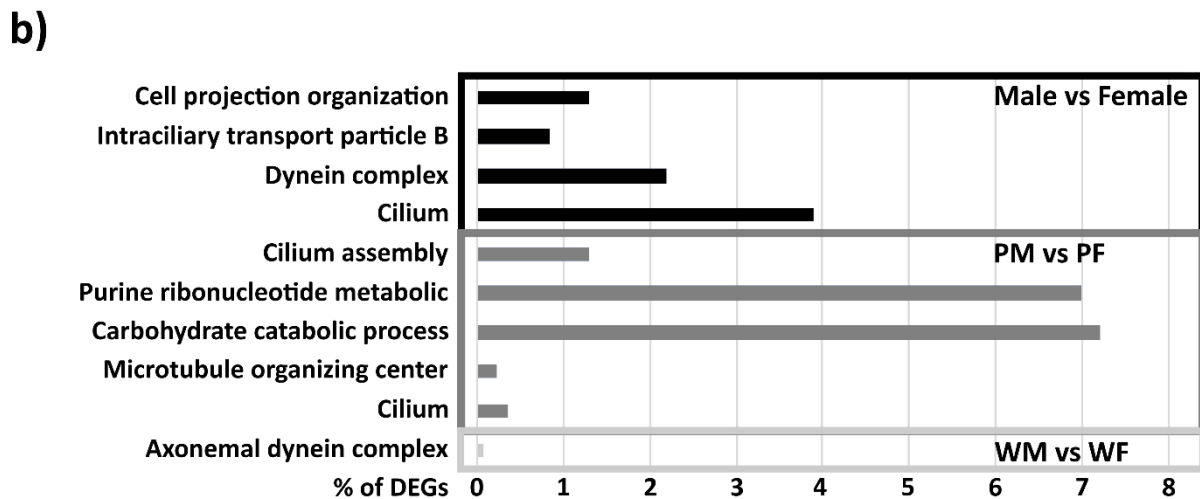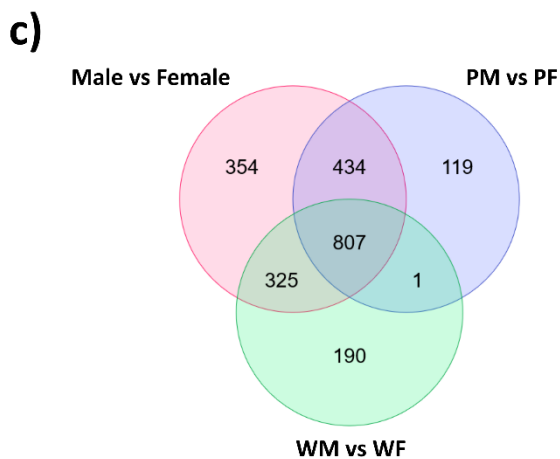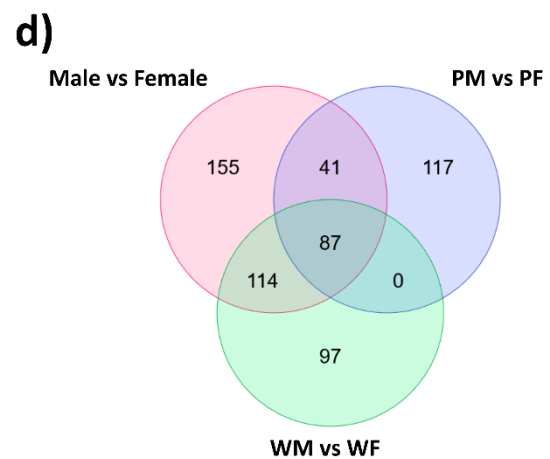

361

362 **Figure 4: Transcriptomic analysis of Physcomitrella WT and mutant gametangia.** a) Variance of  
 363 all samples. Samples group together into male and female, but there is no clear separation between WT  
 364 and mutant samples. M = male (antheridia), F = female (archegonia), W = wild type, P = *pinC#29*. b)

365 All enriched gene ontology terms in upregulated DEGs in the comparison of all male against all female  
366 samples (Male vs Female), all wild type male against wild type female (WM vs WF) and mutant male  
367 against mutant female samples (PM vs PF). c) Venn diagram of all up- and d) downregulated genes in  
368 the comparisons of male and female samples.

369

### 370 **No *PpPINC* differences between Gransden and Reute**

371 After we compared expression data of *PpPINC* in the Gransden and Reute ecotype and could not find  
372 any differences, we checked for differences in genomic sequences using published data (Lang *et al.*,  
373 2018). We compared the whole genomic *PpPINC* sequence from the 5'UTR to the 3'UTR and could  
374 confirm the *PpPINC* gene to be identical between both ecotypes.

### 375 **Altered fertility and abortion rate**

376 We did not observe any differences in the morphology of mature spore capsules or germination rates of  
377 spores between WT and mutant (Supplemental Fig. S10). In contrast, the increased motility of  
378 spermatozooids of the *pinC* mutant led to a significantly higher fertility rate in all three lines  
379 (Supplemental Fig. S11). Low fertility rates of WT Gransden have been reported (Perroud *et al.*, 2011;  
380 Hiss *et al.*, 2017; Meyberg *et al.*, 2020), and in our experiments  $5.5 \pm 0.4$  % of all WT gametophores of  
381 a colony produced a sporophyte. In contrast, all *pinC* mutants developed significantly more spore  
382 capsules, ranging from  $14.5 \pm 0.6$  % for *pinC*#69,  $39.8 \pm 1.6$  % for *pinC*#10 and  $63.2 \pm 4.5$  % for  
383 *pinC*#29. In addition to increased fertility, we detected an increased abortion rate of sporophytes in the  
384 mutants (gametophores with aborted sporophytes: WT =  $0.1 \pm 0.03$  %, *pinC*#10 =  $8.7 \pm 1.3$  %, *pinC*#29  
385 =  $35.4 \pm 1.7$  %, *pinC*#69 =  $6.5 \pm 0.2$  %). The aborted sporophytes were no longer attached to the maternal  
386 tissue (vaginula). Abortion happened around two weeks after fertilization of the egg cell (for reference  
387 of sporophyte development see Ortiz-Ramírez *et al.* (2016) and Lopez-Obando *et al.* (2022)).

388 In the early embryo, *PpPINC* was active in the lower half, excluding the basal tip cells, as well as in the  
389 walls of the maternal tissue that surrounds the young embryo (epigonium) (Fig. 5a). Development of the  
390 sporophyte foot and the maternal tissue are highly synchronized. When the embryo has doubled in size  
391 and the foot is secured in the now fully developed vaginula (Fig. 5b), the seta forms and rips apart the  
392 surrounding tissue of the epigonium, while the later developing spore capsule also starts to separate (Fig.  
393 5c), splitting the epigonium into the calyptra at the apex and the vaginula at the basis of the premeiotic  
394 sporophyte. The expression of *PpPINC* slowly declines in the foot of the embryo (Fig. 5a-c), while it  
395 increases in the maternal tissue during sporophyte foot growth, forming a distinct ring structure at the  
396 border of maternal and sporophytic tissue (Fig. 5b). After the growth spurt, *PpPINC* expression can be  
397 found only in the apophysis (region between seta and premeiotic tissue), while excluding the stomata  
398 cells (Fig. 5d). We found that *Physcomitrella* develops a true-type vaginula, where the foot of the  
399 sporophyte does not penetrate the gametophore tissue under the vaginula (Fig. 5e, f). Sporophyte



400 development is polar in *Physcomitrella*, where the foot of the sporophyte develops faster than the seta  
401 or premeiotic spore capsule. The basis of the foot was not in direct contact with the maternal cells, which  
402 is in line with an earlier report (Regmi *et al.*, 2017), while the vaginula tightened at its apical border to  
403 the sporophyte, which is visible as a reddish-brown coloured ring after the emergence of the premeiotic  
404 sporophyte (Fig. 5g, i). In the mature sporophyte, no *PpPINC* expression was detectable.

405 Aborted sporophytes in WT and mutants were in the premeiotic phase after the separation of the  
406 epigonium (comparable to stage shown in Fig. 5g), and no longer attached to the vaginula. No visible  
407 defects could be detected, apart from the separation of the gametophore. On one occasion we could  
408 observe a sporophyte slipping out of the cavity of the vaginula, not losing contact as the basis of the foot  
409 was stuck in the tighter apical end (Fig. 5h). Empty vaginulae clearly showed the coloured ring formation  
410 at the apical opening (Fig. 5i). The aborted sporophytes had fully developed foot structures, with  
411 haustorium cells at the basis, seta, stomata cells and a depression between seta and haustorium cells,  
412 which we believe results from the securement of the sporophyte by the coloured ring formation (Fig.  
413 5j). We could find no morphological differences in the aborted sporophytes between mutants and WT,  
414 except for an increase in the number of abortions in the mutants. The calyptra could be removed without  
415 resistance, some aborted sporophytes had already lost them (Fig. 5k, l).

416

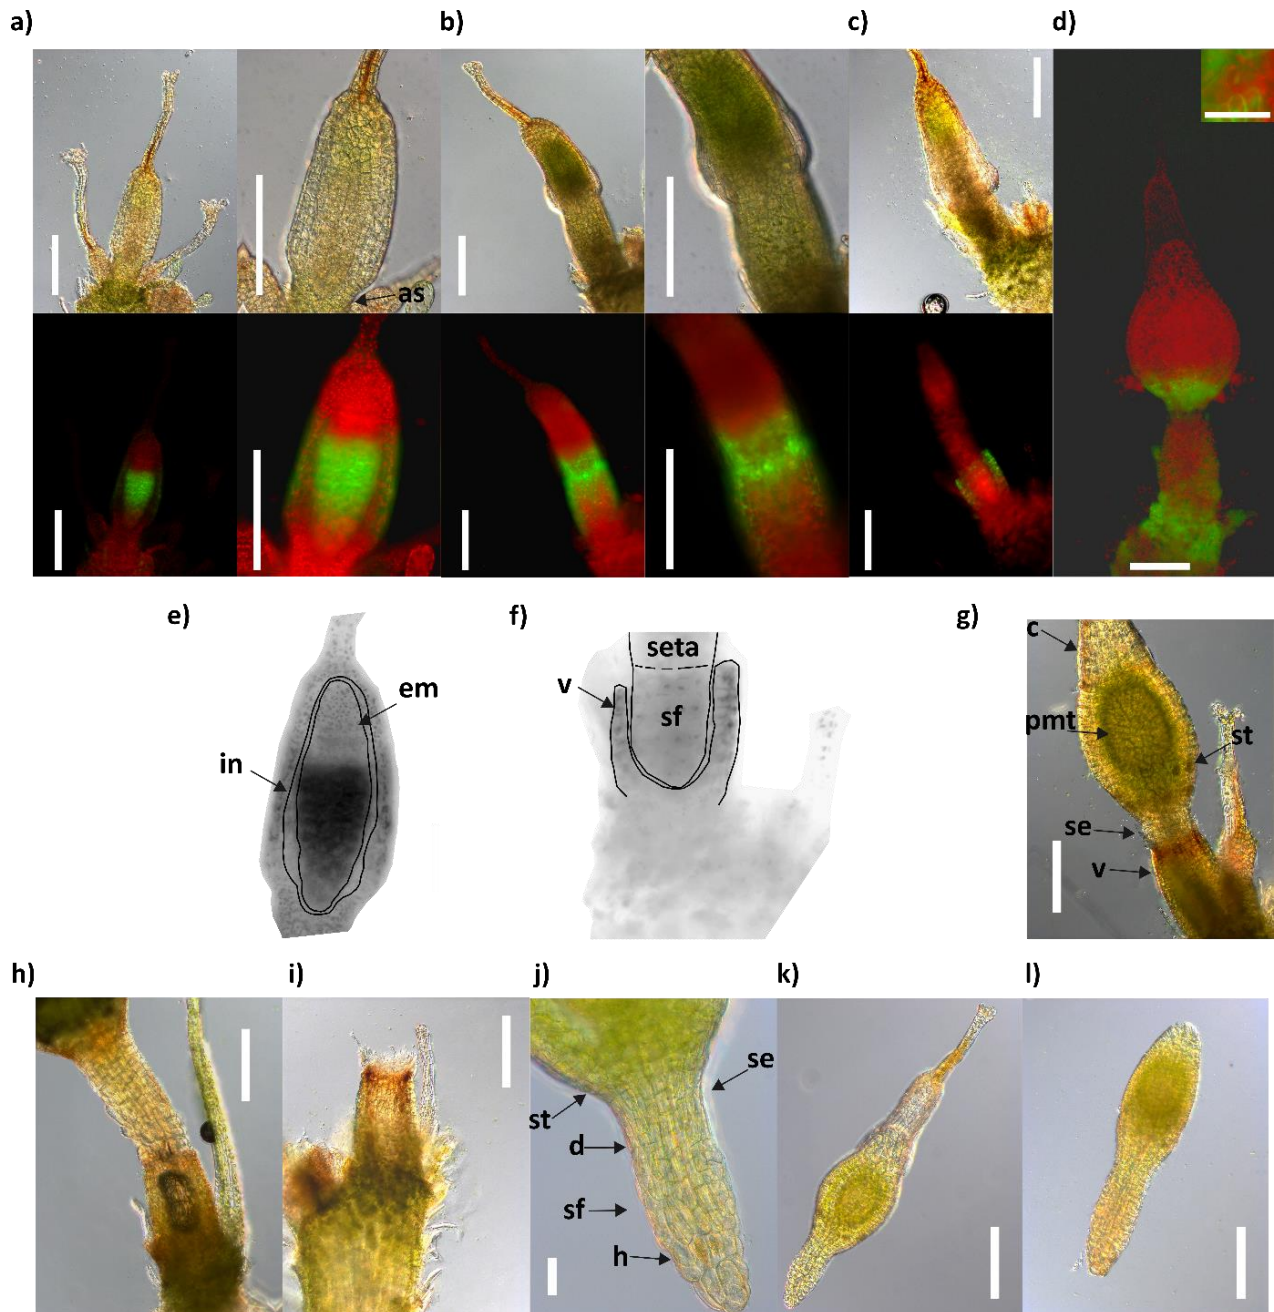

417

418 **Figure 5: Sporophyte development in *Physcomitrella*.** a)-d) Bright-field and fluorescent microscopy  
 419 pictures of *Physcomitrella* PpPINC reporter line. a) Embryo (probably 128 cell stadium) inside the  
 420 epigonium, as = archegonial stalk. b) Embryo has doubled in size, vaginula and sporophyte foot are fully  
 421 developed. c) Growth phase of seta, epigonium is about to rupture. d) Premeiotic sporophyte around 14  
 422 days post fertilization. The fluorescent signal is concentrated in the apophysis excluding stomata cells  
 423 (smaller picture, bar = 25  $\mu$ m). e) and f) = Negative grayscale cut out of a) = e) and c) = f), e) em =  
 424 embryo, and in = inner wall epigonium are outlined in black. f) Fully developed vaginula (v) with  
 425 sporophyte foot (sf) and growing seta are indicated by black lines. g) Premeiotic sporophyte, after the  
 426 epigonium has split into the calyptra (c) and vaginula (v), pmt = premeiotic tissue, se = seta, st = stomata.  
 427 h) Premeiotic sporophyte slips out of vaginula. i) Empty vaginula after abortion. j) Lower half of an  
 428 aborted premeiotic sporophyte, d = depression, h = haustorium cells, se = seta, sf = sporophyte foot, st

429 = stomata). k) Aborted premeiotic sporophyte covered by calyptra. h) – k) = *pinC#29* mutant. l) Aborted  
430 premeiotic sporophyte from WT, not attached to calyptra. Bars in a), c), d), g), h), i), k), and l) = 200  
431  $\mu\text{m}$ . Bar in j) = 50  $\mu\text{m}$ .

432

## 433 Discussion

434 Auxin plays crucial roles in plant development (Santner & Estelle, 2009; Weijers & Wagner, 2016),  
435 including *Physcomitrella* development (Decker *et al.*, 2006; Menand *et al.*, 2007; Fujita *et al.*, 2008;  
436 Coudert *et al.*, 2017; Nemeč-Venza *et al.*, 2022) and biotechnology (Ruiz-Molina *et al.*, 2022). Although  
437 PIN proteins are central in auxin transport and action (Adamowski & Friml, 2015; Sauer & Kleine-  
438 Vehn, 2019; Ung *et al.*, 2022), only two of the three canonical *Physcomitrella* PIN proteins have been  
439 fully characterized; the similar and relatively highly expressed PpPINA and PpPINB. In contrast, little  
440 was known about the function of the more divergent and less expressed PpPINC. Here, we strived to  
441 close this knowledge gap.

442 Our data on the expression of *PpPINC* in young *Physcomitrella* leaves is in line with an earlier report  
443 (Viaene *et al.*, 2014). It was known that the single knockout of *PpPINA* or *PpPINB* has no visible effect  
444 on the morphology of the gametophore (Bennett *et al.*, 2014b), and this is also true for *PpPINC*, as we  
445 have shown here. However, a double knockout of *PpPINA* and *PpPINB* lead to elongated leaves and  
446 stems, similar to treatments with exogenous auxin or auxin transport inhibitors (Bennett *et al.*, 2014b).  
447 This means that, while *PpPINA* or *PpPINB* together with *PpPINC* can rescue the knockout of either *A*  
448 or *B*, *PpPINC* alone cannot replace the function of both proteins in a double knockout line. The publicly  
449 available expression data for canonical PIN proteins in the two *Physcomitrella* ecotypes Gransden and  
450 Reute is not always comparable, as they are different experimental data sets describing specific tissue  
451 stages. However, all three canonical PINs have a similar expression pattern regarding tissue and ecotype.  
452 All three PINs are expressed in gametophores and sporophytes, with PpPINA and PpPINB being more  
453 highly expressed than PpPINC. The expression of all three PINs in vegetative tissue has been reported  
454 (Viaene *et al.*, 2014), as well as the important role of PpPINA and PpPINB in sporophyte formation  
455 (Bennett *et al.*, 2014b). We could not find any differences between the expression of *PpPINC* in the  
456 Gransden and Reute data sets. Further, we did not observe any vegetative phenotype alteration in *pinC*  
457 knockout mutants. In contrast, we could identify PpPINC as an important regulator of spermatogenesis  
458 and sporophyte development. We therefore conclude that PpPINC is functionally active only in  
459 gametangia and sporophytic tissues, contrary to the other two canonical *Physcomitrella* PIN proteins.

460 It has been reported that the low fertility of the *Physcomitrella* ecotype Gransden is based on reduced  
461 male fertility (Perroud *et al.*, 2011). This is partially caused by coiled up flagella of spermatozoids in  
462 the Gransden ecotype, which results in low sperm motility (Meyberg *et al.*, 2020). We confirm this  
463 spermatozoid phenotype for the Gransden ecotype, with a high percentage of coiled flagella and a

464 motility of under 50 %, resulting in a very low sporophyte production rate. In contrast, the *pinC* mutants,  
465 which we generated in the Gransden background, resemble in their sperm morphology and fertility rate  
466 the Reute ecotype, which has no coiled flagella, a high sperm motility and a high sporophyte rate (Hiss  
467 *et al.*, 2017; Meyberg *et al.*, 2020). The Gransden ecotype was introduced by Engel (1968) as a  
468 laboratory strain from one single spore from the UK, and has been propagated mostly vegetatively in  
469 laboratories around the world since, while the Reute ecotype was introduced relatively recently as a  
470 collection from Germany (Hiss *et al.*, 2017). Compared to Reute, Gransden accumulated somatic,  
471 epigenetic mutations, probably leading to the faults in spermatogenesis (Haas *et al.*, 2020).

472 Here, we found that mature antheridia of a *PpPINC* knockout mutant have a higher expression of  
473 spermatogenesis-related genes compared to WT. Activity of a *TAR* gene and *PpPINA* in the apical cells  
474 of the mature antheridium has been reported (Landberg *et al.*, 2013; Landberg *et al.*, 2020), while there  
475 are no reports of deviating gametangia in *PpPINA* mutants. Here, we also found evidence for expression  
476 of auxin synthesis-genes in mature gametangia. With *PpPINC* being expressed in the foot of the mature  
477 antheridium, contrary to *PpPINA* in the apical tip cell, it seems to be more important for spermatogenesis  
478 controlling auxin homeostasis at the bottom of the antheridium than at the tip. Whether this mode of  
479 action is part of a polar auxin homeostasis in a moss organ controlled by PIN proteins needs further  
480 clarification.

481 Gaining the ability to move the flagellum is one of the final steps of spermatogenesis before  
482 spermatozooids are released and activated. In mammals, this ability is gained in the epididymis, and is  
483 controlled by different external and internal factors (Pereira *et al.*, 2017; O’Flaherty, 2019; Björkgren  
484 & Sipilä, 2019). Due to the complexity of the process and a large number of influences, sperm  
485 populations are not homogenous, but vary regarding phenotype, motility or activity (Gómez Montoto *et*  
486 *al.*, 2011; Genau *et al.*, 2021; Martins-Bessa *et al.*, 2021). A key role in metazoan and *Physcomitrella*  
487 spermatogenesis is played by the evolutionary conserved DNA Topoisomerase 1 $\alpha$ , which facilitates  
488 chromatin condensation towards the compact sperm head (Gu *et al.*, 2022). Activation of the flagella of  
489 released spermatozooids depends on changes in pH, calcium concentration, or presence of a  
490 chemoattractant released by the egg cell (Nakajima, 2005; Suarez, 2008; Morita *et al.*, 2009). While  
491 mammalian spermatozooids are transported through the epididymis during maturation, spermatogenesis  
492 in the moss antheridium is stationary. This increases pressure on the exact spatiotemporal expression of  
493 spermatogenesis-related genes. As in mammals, *Physcomitrella* releases heterogeneous sperm  
494 populations from one antheridium. This was true for WT where motility (~40 %) and non-coiled flagella  
495 (~40 %) seem to fit nicely, whereas in the *pinC*#29 mutant over 90 % of all spermatozooids were straight,  
496 with an overall motility of 60 %. While the phenotype of the spermatozooids changed drastically in the  
497 mutant, motility did not increase at the same rate. As we have shown, *PpPINC* is expressed only shortly  
498 before sperm cells are released, reducing the time it can influence spermatogenesis to a short window.  
499 Therefore, alterations in duration and strength of expression, which are likely to occur after somatic

500 mutations, could explain the differences in sperm morphology between the two ecotypes Gransden and  
501 Reute (Meyberg *et al.*, 2020). The *PpPINC* gDNA sequence between the Gransden ecotype (v3.3  
502 Phytozome genome ID:318) and Reute (SRX1528135; Hiss *et al.*, 2017) is identical. Given that the  
503 mutant antheridia exhibit an increase in spermatogenesis-related gene expression together with an  
504 overall increased motility and fertility, one could argue that *PpPINC* acts as a repressor for  
505 spermatogenesis. The repression of spermatogenesis at the end of the whole process could be a  
506 molecular signal for sperm release or activation of flagella. The difference in expression between both  
507 ecotypes would be an earlier repression in Gransden, halting spermatogenesis when most of the flagella  
508 are coiled and not yet ready for release, while the signal in Reute comes later, when spermatogenesis  
509 has progressed to a majority of non-coiled sperm flagella. The unknown activating signal of *PpPINC*  
510 expression could therefore be the culprit responsible for reduced male fertility in the Gransden ecotype.

511 Male sexuality is reduced in many bryophytes, with a female-biased sex ratio (Cameron & Wyatt, 1990;  
512 Stark *et al.*, 2010; Pépin *et al.*, 2013; Bisang *et al.*, 2015; de Jong *et al.*, 2018), or size of the plants, with  
513 the occurrence of dwarf males (nannandry), which are unique in bryophytes among land plants  
514 (Pedersen *et al.*, 2006; Rosengren & Cronberg, 2014; Rosengren *et al.*, 2016; Lang *et al.*, 2021). Dwarf  
515 males grow on the leaves of female plants (Pichonet & Gradstein, 2012; Rosengren & Cronberg, 2014;  
516 Rosengren *et al.*, 2016; Lang *et al.*, 2021) and increase fertilization success (Hedenäs & Bisang 2012;  
517 Rosengren & Cronberg, 2014), in the absence of a female, male spores develop normally. In  
518 *Macromitrium japonicum*, dwarf males grew in culture on medium containing auxin, but developed  
519 normally on auxin-free medium (Une, 1985). Dioecious mosses grow mostly vegetatively and  
520 sporophyte production can be rare due to absence of a sexual partner, while monoecious mosses produce  
521 sporophytes more frequently, as the chances for fertilization are higher (Haig, 2016). However, self-  
522 fertilization leads to homozygous spores, while self-produced sperm are rarely outcompeted by non-self  
523 sperm (Taylor *et al.*, 2007; Rosengren *et al.*, 2016). Reducing male fertility in a monoecious moss  
524 increases the chance for outcrossing and could therefore be an internal mechanism, controlling the need  
525 to refresh genetic material (McDaniel *et al.*, 2010; Haig, 2016; Szovenyi *et al.*, 2017). In a monoecious  
526 moss like *Physcomitrella* with a very short life cycle (3-6 months) (Cove, 2005), pressure on mutations  
527 regarding the sexual life cycle is strong, as changes in fertility would be lethal (Haig, 2016). Cultivation  
528 in vegetative culture in laboratories around the world (Haas *et al.*, 2020) could reduce this pressure on  
529 fertility, increasing the risk for severe mutations in the sexual signalling cascade (Meyberg *et al.*, 2020;  
530 Haas *et al.*, 2020). As male gametes need more energy and are more complex to build than female  
531 gametes (Rydgren & Økland, 2003; Stark *et al.*, 2000, 2009; Horsley *et al.*, 2011; Santos *et al.*, 2022),  
532 risk for mutations is higher. This cost calculation would also favour intentionally reducing male rather  
533 than female fertility, as more energy is required to constantly produce sperm cells, rather than egg cells,  
534 which are waiting for fertilization, ending the gamete production cycle and starting the growth of  
535 propagules.

536 In Arabidopsis, the expression of PIN proteins plays an important role during pollen development,  
537 together with anther-specific expression of YUCCA genes (Cecchetti *et al.*, 2008; Dal Bosco *et al.*,  
538 2012). PIN8 locates to the ER and regulates auxin homeostasis with a rate-limiting activity during pollen  
539 grain development and pollen tube growth. It is functionally active only during male gametophyte  
540 development and a knockout of PIN8 leads to misshaped and aborted pollen (Ding *et al.*, 2012; Bosco  
541 *et al.*, 2012). The activity of PIN proteins in male gametophytic tissues is also reported in algae, in  
542 *Chara vulgaris* a PIN2-like protein is expressed during spermatogenesis (Žabka *et al.*, 2016). Together  
543 with our findings it seems plausible that PIN proteins can play important roles during male gametophytic  
544 development in all plants. However, the exclusive function of PIN1 in Arabidopsis in the formation of  
545 floral organs, could not be rescued by the *Physcomitrella* PpPINA protein expressed under the PIN1  
546 promoter, while it complements the vegetative phenotype of the knockout (Zhang *et al.*, 2020).

547 The abortion of embryos is a natural process. Unfavourable environmental conditions, genetic  
548 mutations, injury of the embryo or of maternal tissue can trigger abortion. In mosses, the normal abortion  
549 rate differs among species (Stark & Stephenson, 1983; Stark *et al.*, 2009; Rosengren *et al.*, 2016;  
550 Hedenäs & Bisang, 2019) and seems to be resource-limited (Stark *et al.*, 2000). Mosses have to allocate  
551 their energy between clonal regeneration and sexual reproduction (Stark *et al.*, 2009), and sporophyte  
552 survival positively correlates with vegetative growth prior to fertilization (Stark & Stephenson, 1983).  
553 In these cases, aborted sporophytes were no longer supported with nutrients and stopped growing inside  
554 the vaginula, contrary to the active abortion we observed here.

555 The haustorium cells of the sporophyte foot are not pressed against the vaginula tissue but surrounded  
556 by a placenta-like space, while both tissues are separated by a diffusion barrier (Uzawa & Higuchi, 2010;  
557 Regmi *et al.*, 2017). The foot of the sporophyte is wider than the seta with a small depression between  
558 seta and foot, while vital sporophytes are tightly attached to the gametophore. We observed a clear  
559 polarity during early embryo development favouring growth of the foot, while the upper part of the  
560 embryo starts to increase only after the foot is secured in the vaginula. *PpPINC* is active in the maternal  
561 tissues which will form the vaginula and the sclerotized ring structure after the sporophyte ruptures the  
562 epigonium. Premeiotic sporophytes were aborted after the epigonium had ruptured and the sporophyte  
563 foot had to be secured in the vaginula. The increased abortion rate in our mutants, combined with the  
564 activity of *PpPINC* at the vaginula-seta junction, point to a regulation of sporophyte securement  
565 controlled at least partially by *PpPINC*. Based on our observations, we suggest that the sclerotized,  
566 brown ring structure at the vaginula-seta junction has the mechanical function of securing the sporophyte  
567 foot.

568 The polarity of early embryo development we observed here in *Physcomitrella* as well as the functional  
569 significance of the sclerotized ring structure is in line with the findings of Lorch (1909) in the moss  
570 family Polytrichaceae. He reported that the sporophyte foot develops first, before the seta subsequently  
571 elongates, and as the lumen in the vaginula is not completely filled by the foot, the sclerotized ring

572 structure must secure the sporophyte (Lorch, 1909). As we could not find a name for this ring structure  
573 in the literature, we propose to name the reddish-brown ring structure, formed at the junction of vaginula  
574 and seta, the Lorch ring.

575 Taken together, the canonical *Physcomitrella* PINC protein is functional in reproductive tissues only, an  
576 important regulator of late spermatogenesis and of active abortion of premeiotic sporophytes. Thus, it  
577 may integrate environmental signals with developmental programs to regulate sexual reproduction, at  
578 least in moss gametangia and early stages of embryo development.

579

580 **Acknowledgements:** We gratefully acknowledge Nico van Gessel for consultation on transcriptomic  
581 sequence analysis, Richard Haas for expert technical advice and assistance extracting RNA from  
582 gametangia, and Anne Katrin Prowse for proof-reading of the manuscript.

583

584 **Author contributions:** VML, CR, ELD and RR planned and designed the research. VML did most of  
585 the experimental work. Data analysis of transcriptomic sequences was done by VML, guided by CR.  
586 MB created the knockout constructs and first knockout plants. OH took pictures of spermatozoids and  
587 aborted sporophytes. MR did measurements of stems and leaves, while data analysis for this was done  
588 by VML. ELD and RR supervised research. VML wrote the manuscript with help by ELD and RR.  
589 We gratefully acknowledge funding by the Deutsche Forschungsgemeinschaft (DFG, German  
590 Research Foundation) under Germany's Excellence Strategy EXC-2189 (CIBSS to RR) and EXC-  
591 2193/1 – 390951807 (*livMatS* to RR). All authors read and approved the final version of the  
592 manuscript.

593

594 **Declaration:** All authors declare to have no competing interests.

595

#### 596 **ORCID IDs**

597 VLM: 0000-0002-2923-4236; CR: 0000-0002-0672-3897; OH: 0000-0003-3958-5061;

598 MR: 0000-0002-2659-3372; MB: 0000-0002-3601-5250; ELD: 0000-0002-9151-1361;

599 RR: 0000-0002-5496-6711

600

#### 601 **Data availability**

602 All RNA-seq samples as well as the DEG experiments created in this study are available via the NCBI  
603 GEO project **GSE205257**. All moss lines used are available via the International Moss Stock Center  
604 (IMSC; <https://www.moss-stock-center.org>) with the following accession numbers: WT = 40095,  
605 *PinCPromCit* = 40917, *pinC#10* = 40918, *pinC#29* = 40919, *pinC#69* = 40420.

606 **References**

- 607 **Adamowski M, Friml J. 2015.** PIN-dependent auxin transport: Action, regulation, and development.  
608 *Plant Cell* **27**: 20–32.
- 609 **Bennett T, Brockington SF, Rothfels C, Graham SW, Stevenson D, Kutchan T, Rolf M, Thomas**  
610 **P, Wong GK-S, Leyser O, et al. 2014a.** Paralogous radiations of PIN proteins with multiple origins of  
611 noncanonical PIN structure. *Molecular Biology and Evolution* **31**: 2042–2060.
- 612 **Bennett TA, Liu MM, Aoyama T, Bierfreund NM, Braun M, Coudert Y, Dennis RJ, O’Connor**  
613 **D, Wang XY, White CD, et al. 2014b.** Plasma membrane-targeted PIN proteins drive shoot  
614 development in a moss. *Current Biology* **24**: 2776–2785.
- 615 **Bierfreund NM, Reski R, Decker EL. 2003.** Use of an inducible reporter gene system for the analysis  
616 of auxin distribution in the moss *Physcomitrella patens*. *Plant Cell Reports* **21**: 1143–1152.
- 617 **Bisang I, Ehrlén J, Korpelainen H, Hedenäs L. 2015.** No evidence of sexual niche partitioning in a  
618 dioecious moss with rare sexual reproduction. *Annals of Botany* **116**: 771–779.
- 619 **Björkgren I, Sipilä P. 2019.** The impact of epididymal proteins on sperm function. *Reproduction* **158**:  
620 R155–R167.
- 621 **Bosco CD, Dovzhenko A, Liu X, Woerner N, Rensch T, Eismann M, Eimer S, Hegermann J,**  
622 **Paponov IA, Ruperti B, et al. 2012.** The endoplasmic reticulum localized PIN8 is a pollen-specific  
623 auxin carrier involved in intracellular auxin homeostasis: Endoplasmic reticulum localized PIN8. *Plant*  
624 *Journal* **71**: 860–870.
- 625 **Cameron RG, Wyatt R. 1990.** Spatial patterns and sex ratios in dioecious and monoecious mosses of  
626 the genus *Splachnum*. *The Bryologist* **93**: 161-166.
- 627 **Cancé C, Martin-Arevalillo R, Boubekour K, Dumas R. 2022.** ARFs are keys to the many auxin  
628 doors. *New Phytologist*: doi: 10.1111/NPH.18159.
- 629 **Cecchetti V, Altamura MM, Falasca G, Costantino P, Cardarelli M. 2008.** Auxin regulates  
630 *Arabidopsis* anther dehiscence, pollen maturation, and filament elongation. *Plant Cell* **20**: 1760–1774.
- 631 **Coudert Y, Bell NE, Edelin C, Harrison CJ. 2017.** Multiple innovations underpinned branching form  
632 diversification in mosses. *New Phytologist* **215**: 840-850.
- 633 **Cove D. 2005.** The moss *Physcomitrella patens*. *Annual Review of Genetics* **39**: 339-358.
- 634 **Dal Bosco C, Dovzhenko A, Palme K. 2012.** Intracellular auxin transport in pollen: PIN8, PIN5 and  
635 PILS5. *Plant Signaling & Behavior* **7**: 1504–1505.
- 636 **Decker EL, Frank W, Sarnighausen E, Reski R. 2006.** Moss systems biology *en route*:  
637 Phytohormones in *Physcomitrella* development. *Plant Biology* **8**: 397–406.
- 638 **Ding Z, Wang B, Moreno I, Dupláková N, Simon S, Carraro N, Reemmer J, Pěňčík A, Chen X,**  
639 **Tejos R, et al. 2012.** ER-localized auxin transporter PIN8 regulates auxin homeostasis and male  
640 gametophyte development in *Arabidopsis*. *Nature Communications* **3**: 941.
- 641 **Egener T, Granado J, Guitton M-C, Hohe A, Holtorf H, Lucht JM, Rensing SA, Schlink K, Schulte**  
642 **J, Schween G, et al. 2002.** High frequency of phenotypic deviations in *Physcomitrella patens* plants  
643 transformed with a gene-disruption library. *BMC Plant Biology* **2**: 6.
- 644 **Fernandez-Pozo N, Haas FB, Meyberg R, Ullrich KK, Hiss M, Perroud P, Hanke S, Kratz V,**  
645 **Powell AF, Vesty EF, et al. 2020.** PEATmoss (*Physcomitrella* Expression Atlas Tool): a unified gene  
646 expression atlas for the model plant *Physcomitrella patens*. *Plant Journal* **102**: 165–177.



- 647 **Flores-Sandoval E, Eklund DM, Bowman JL. 2015.** A simple auxin transcriptional response system  
648 regulates multiple morphogenetic processes in the liverwort *Marchantia polymorpha*. *PLOS Genetics*  
649 **11:** e1005207.
- 650 **Fujita T, Sakaguchi H, Hiwatashi Y, Wagstaff SJ, Ito M, Deguchi H, Sato T, Hasebe M. 2008.**  
651 Convergent evolution of shoots in land plants: lack of auxin polar transport in moss shoots: Convergent  
652 evolution of shoots in land plants. *Evolution & Development* **10:** 176–186.
- 653 **Genau AC, Li Z, Renzaglia KS, Pozo NF, Nogué F, Haas FB, Wilhelmson PKI, Ullrich KK,  
654 Schreiber M, Meyberg R, et al. 2021.** HAG1 and SWI3A/B control of male germ line development in  
655 *P. patens* suggests conservation of epigenetic reproductive control across land plants. *Plant*  
656 *Reproduction* **34:** 149–173.
- 657 **Gómez Montoto L, Magaña C, Tourmente M, Martín-Coello J, Crespo C, Luque-Larena JJ,  
658 Gomendio M, Roldan ERS. 2011.** Sperm competition, sperm numbers and sperm quality in murid  
659 rodents. *PLOS ONE* **6:** e18173.
- 660 **Gu N, Chen C, Kabeya Y, Hasebe M, Tamada Y. 2022.** Topoisomerase 1 $\alpha$  is required for  
661 synchronous spermatogenesis in *Physcomitrium patens*. *New Phytologist* **234:** 137–148.
- 662 **Haig D. 2016.** Living together and living apart: the sexual lives of bryophytes. *Philosophical*  
663 *Transactions of the Royal Society B: Biological Sciences* **371:** 20150535.
- 664 **Hashida Y, Takechi K, Abiru T, Yabe N, Nagase H, Hattori K, Takio S, Sato Y, Hasebe M,  
665 Tsukaya H, et al. 2020.** Two *ANGUSTIFOLIA* genes regulate gametophore and sporophyte  
666 development in *Physcomitrella patens*. *Plant Journal* **101:** 1318–1330.
- 667 **Heck MA, Lüth VM, van Gessel N, Krebs M, Kohl M, Prager A, Joosten H, Decker EL, Reski R.  
668 2021.** Axenic *in vitro* cultivation of 19 peat moss (*Sphagnum* L.) species as a resource for basic biology,  
669 biotechnology and paludiculture. *New Phytologist* **229:** 861–876.
- 670 **Hedenäs L, Bisang I. 2012.** Sex expression and sex ratios in dwarf male-producing pleurocarpous  
671 mosses – have we missed something? *Plant Ecology & Diversity* **5,** 387 – 393.
- 672 **Hedenäs L, Bisang I. 2019.** Episodic but ample sporophyte production in the moss *Drepanocladus*  
673 *turgescens* (Bryophyta: Amblystegiaceae) in SE Sweden. *Acta Musei Silesiae, Scientiae Naturales* **68:**  
674 83–93.
- 675 **Hiss M, Laule O, Meskauskiene RM, Arif MA, Decker EL, Erxleben A, Frank W, Hanke ST,  
676 Lang D, Martin A, et al. 2014.** Large-scale gene expression profiling data for the model moss  
677 *Physcomitrella patens* aid understanding of developmental progression, culture and stress conditions.  
678 *Plant Journal* **79:** 530–539.
- 679 **Hiss M, Meyberg R, Westermann J, Haas FB, Schneider L, Schallenberg-Rüdinger M, Ullrich  
680 KK, Rensing SA. 2017.** Sexual reproduction, sporophyte development and molecular variation in the  
681 model moss *Physcomitrella patens*: introducing the ecotype Reute. *Plant Journal* **90:** 606–620.
- 682 **Hohe A, Reski R. 2002.** Optimisation of a bioreactor culture of the moss *Physcomitrella patens* for  
683 mass production of protoplasts. *Plant Science* **163:** 69–74.
- 684 **Hohe A, Rensing SA, Mildner M, Lang D, Reski R. 2002.** Day length and temperature strongly  
685 influence sexual reproduction and expression of a novel MADS-box gene in the moss *Physcomitrella*  
686 *patens*. *Plant Biology* **4:** 595–602.
- 687 **Horst NA, Reski R. 2017.** Microscopy of *Physcomitrella patens* sperm cells. *Plant Methods* **13:** 33.
- 688 **Horst NA, Katz A, Pereman I, Decker EL, Ohad N, Reski R. 2016.** A single homeobox gene triggers  
689 phase transition, embryogenesis and asexual reproduction. *Nature Plants* **2:** 15209.

- 690 **de Jong TJ, During HJ, Shmida A. 2018.** Differences and similarities of sex ratios between dioecious  
691 angiosperms and dioicous bryophytes. *Evolutionary Ecology Research* **19**: 365–386.
- 692 **Karlin EF, Hotchkiss SC, Boles SB, Stenøien HK, Hassel K, Flatberg KI, Shaw AJ. 2012.** High  
693 genetic diversity in a remote island population system: *sans sex*. *New Phytologist* **193**: 1088–1097.
- 694 **Kirbis A, Waller M, Ricca M, Bont Z, Neubauer A, Goffinet B, Szövényi P. 2020.** Transcriptional  
695 landscapes of divergent sporophyte development in two mosses, *Physcomitrium* (*Physcomitrella*) *patens*  
696 and *Funaria hygrometrica*. *Frontiers in Plant Science* **11**: 747.
- 697 **Kofuji R, Hasebe M. 2014.** Eight types of stem cells in the life cycle of the moss *Physcomitrella patens*.  
698 *Current Opinion in Plant Biology* **17**: 13–21.
- 699 **Koshimizu S, Kofuji R, Sasaki-Sekimoto Y, Kikkawa M, Shimojima M, Ohta H, Shigenobu S,  
700 Kabeya Y, Hiwatashi Y, Tamada Y, et al. 2018.** *Physcomitrella* MADS-box genes regulate water  
701 supply and sperm movement for fertilization. *Nature Plants* **4**: 36–45.
- 702 **Krogh A, Larsson B, von Heijne G, Sonnhammer ELL. 2001.** Predicting transmembrane protein  
703 topology with a hidden Markov model: application to complete genomes. *Journal of Molecular Biology*  
704 **305**: 567–580.
- 705 **Landberg K, Pederson ERA, Viaene T, Bozorg B, Friml J, Jonsson H, Thelander M, Sundberg E.  
706 2013.** The moss *Physcomitrella patens* reproductive organ development is highly organized, affected by  
707 the two SHI/STY genes and by the level of active auxin in the SHI/STY expression domain. *Plant*  
708 *Physiology* **162**: 1406–1419.
- 709 **Landberg K, Šimura J, Ljung K, Sundberg E, Thelander M. 2020.** Studies of moss reproductive  
710 development indicate that auxin biosynthesis in apical stem cells may constitute an ancestral function  
711 for focal growth control. *New Phytologist* **229**: 845–860.
- 712 **Landberg K, Lopez-Obando M, Sanchez Vera V, Sundberg E, Thelander M. 2022.** *MS1/MMD1*  
713 homologs in the moss *Physcomitrium patens* are required for male and female gametogenesis. *New*  
714 *Phytologist* doi:10.1111/nph.18352
- 715 **Lang D, Ullrich KK, Murat F, Fuchs J, Jenkins J, Haas FB, Piednoel M, Gundlach H, Van Bel M,  
716 Meyberg R, et al. 2018.** The *Physcomitrella patens* chromosome-scale assembly reveals moss genome  
717 structure and evolution. *Plant Journal* **93**: 515–533.
- 718 **Lang AS, Gehrman T, Cronberg N. 2021.** Genetic diversity and population structure in bryophyte  
719 with facultative nannandry. *Frontiers in Plant Science* **12**: 517547.
- 720 **Larkin MA, Blackshields G, Brown NP, Chenna R, McGettigan PA, McWilliam H, Valentin F,  
721 Wallace IM, Wilm A, Lopez R, et al. 2007.** Clustal W and Clustal X version 2.0. *Bioinformatics* **23**:  
722 2947–2948.
- 723 **Ludwig-Müller J, Sülke S, Bierfreund NM, Decker EL, Reski R. 2009.** Moss (*Physcomitrella*  
724 *patens*) GH3 proteins act in auxin homeostasis. *New Phytologist* **181**: 323–338.
- 725 **Lopez-Obando M, Hoffmann B, Géry C, Guyon-Debast A, Téoulé E, Rameau C, Bonhomme S,  
726 Nogué F. 2016.** Simple and efficient targeting of multiple genes through CRISPR-Cas9 in  
727 *Physcomitrella patens*. *G3 (Bethesda, Md.)* **6**: 3647–3653.
- 728 **Lopez-Obando M, Landberg K, Sundberg E, Thelander M. 2022.** Dependence on clade II bHLH  
729 transcription factors for nursing of haploid products by tapetal-like cells is conserved between moss  
730 sporangia and angiosperm anthers. *New Phytologist*: nph.17972.
- 731 **Lorch W. 1909.** Die Polytrichaceen. Eine biologische Monographie. *Abhandlungen der Bayerischen*  
732 *Akademie der Wissenschaften - Mathematisch-naturwissenschaftliche Klasse*: 445–546.

- 733 **Maciel-Silva A, Cavalcanti Pôrto K. 2014.** Reproduction in Bryophytes. In: Gopal Ramawat K,  
734 Merillon JM, Shivanna KR, eds. Reproductive Biology of Plants. CRC Press, 57–84.
- 735 **Madeira F, Park Y mi, Lee J, Buso N, Gur T, Madhusoodanan N, Basutkar P, Tivey ARN, Potter**  
736 **SC, Finn RD, et al. 2019.** The EMBL-EBI search and sequence analysis tools APIs in 2019. *Nucleic*  
737 *Acids Research* **47**: W636–W641.
- 738 **Martins-Bessa A, Quaresma M, Leiva B, Calado A, Navas González FJ. 2021.** Bayesian linear  
739 regression modelling for sperm quality parameters using age, body weight, testicular morphometry, and  
740 combined biometric indices in donkeys. *Animals* **11**: 176.
- 741 **McDaniel SF, von Stackelberg M, Richardt S, Quatrano RS, Reski R, Rensing SA. 2010.** The  
742 speciation history of the Physcomitrium-Physcomitrella species complex. *Evolution* **64**: 217-231.
- 743 **Menand B, Yi KK, Jouannic S, Hoffmann L, Ryan E, Linstead P, Schaefer DG, Dolan L. 2020.** An  
744 ancient mechanism controls the development of cells with a rooting function in land plants. *Science* **316**:  
745 1477-1480.
- 746 **Meyberg R, Perroud P, Haas FB, Schneider L, Heimerl T, Renzaglia KS, Rensing SA. 2020.**  
747 Characterization of evolutionarily conserved key players affecting eukaryotic flagellar motility and  
748 fertility using a moss model. *New Phytologist* **227**: 440-454.
- 749 **Morita M, Kitamura M, Nakajima A, Sri Susilo E, Takemura A, Okuno M. 2009.** Regulation of  
750 sperm flagellar motility activation and chemotaxis caused by egg-derived substance(s) in sea cucumber.  
751 *Cell Motility and the Cytoskeleton* **66**: 202–214.
- 752 **Mosquna A, Katz A, Decker EL, Rensing SA, Reski R, Ohad N. 2009.** Regulation of stem cell  
753 maintenance by the Polycomb protein FIE has been conserved during land plant evolution. *Development*  
754 **136**: 2433–2444.
- 755 **Nakajima A. 2005.** Increase in intracellular pH induces phosphorylation of axonemal proteins for  
756 activation of flagellar motility in starfish sperm. *Journal of Experimental Biology* **208**: 4411–4418.
- 757 **Needleman SB, Wunsch CD. 1970.** A general method applicable to the search for similarities in the  
758 amino acid sequence of two proteins. *Journal of Molecular Biology* **48**: 443–453.
- 759 **Nemec-Venza Z, Madden C, Stewart A, Liu W, Novak O, Pencik A, Cuming AC, Kamisugi Y,**  
760 **Harrison CJ. 2022.** CLAVATA modulates auxin homeostasis and transport to regulate stem cell  
761 identity and plant shape in a moss. *New Phytologist* **234**: 149–163.
- 762 **Noy-Malka C, Yaari R, Itzhaki R, Mosquna A, Auerbach Gershovitz N, Katz A, Ohad N. 2014.** A  
763 single CMT methyltransferase homolog is involved in CHG DNA methylation and development of  
764 *Physcomitrella patens*. *Plant Molecular Biology* **84**: 719–735.
- 765 **O’Flaherty C. 2019.** Orchestrating the antioxidant defenses in the epididymis. *Andrology* **7**: 662-668.
- 766 **Ortiz-Ramírez C, Hernandez-Coronado M, Thamm A, Catarino B, Wang M, Dolan L, Feijó JA,**  
767 **Becker JD. 2016.** A transcriptome atlas of *Physcomitrella patens* provides insights into the evolution  
768 and development of land plants. *Molecular Plant* **9**: 205–220.
- 769 **Ortiz-Ramírez C, Michard E, Simon AA, Damineli DSC, Hernández-Coronado M, Becker JD,**  
770 **Feijó JA. 2017.** GLUTAMATE RECEPTOR-LIKE channels are essential for chemotaxis and  
771 reproduction in mosses. *Nature* **549**: 91–95.
- 772 **Ostendorf AK, Van Gessel N, Malkowsky Y, Sabovljevic MS, Rensing SA, Roth-Nebelsick A,**  
773 **Reski R. 2021.** Polyploidization within the Funariaceae—a key principle behind speciation, sporophyte  
774 reduction and the high variance of spore diameters? *Bryophyte Diversity and Evolution* **43**: 164-179.

- 775 **Paponov IA, Teale W, Lang D, Paponov M, Reski R, Rensing SA, Palme K. 2009.** The evolution of  
776 nuclear auxin signalling. *BMC Evolutionary Biology* **9**: 126.
- 777 **Parsons J, Altmann F, Arrenberg CK, Koprivova A, Beike AK, Stemmer C, Gorr G, Reski R,**  
778 **Decker EL. 2012.** Moss-based production of asialo-erythropoietin devoid of Lewis A and other plant-  
779 typical carbohydrate determinants: Lewis A-free recombinant EPO from moss. *Plant Biotechnology*  
780 *Journal* **10**: 851–861.
- 781 **Pedersen N, Russell SJ, Newton AE, Ansell SW. 2006.** A novel molecular protocol for the rapid  
782 extraction of DNA from bryophytes and the utility of direct amplification of DNA from a single dwarf  
783 male. *The Bryologist* **109**: 257–264.
- 784 **Pépin F, Hugonnot V, Celle J. 2013.** Sex ratio patterns and fertility of *Hamatocaulis vernicosus* (Mitt.)  
785 Hedenäs at different spatial scales. *Journal of Bryology* **35**: 20–26.
- 786 **Pereira R, Sá R, Barros A, Sousa M. 2017.** Major regulatory mechanisms involved in sperm motility.  
787 *Asian Journal of Andrology* **19**: 5–14.
- 788 **Perroud P-F, Cove DJ, Quatrano RS, McDaniel SF. 2011.** An experimental method to facilitate the  
789 identification of hybrid sporophytes in the moss *Physcomitrella patens* using fluorescent tagged lines.  
790 *New Phytologist* **191**: 301–306.
- 791 **Perroud P-F, Haas FB, Hiss M, Ullrich KK, Alboresi A, Amirebrahimi M, Barry K, Bassi R,**  
792 **Bonhomme S, Chen H, et al. 2018.** The *Physcomitrella patens* gene atlas project: large-scale RNA-seq  
793 based expression data. *Plant Journal* **95**: 168–182.
- 794 **Picelli S, Faridani OR, Björklund ÅK, Winberg G, Sagasser S, Sandberg R. 2014.** Full-length  
795 RNA-seq from single cells using Smart-seq2. *Nature Protocols* **9**: 171–181.
- 796 **Regmi KC, Li L, Gaxiola RA. 2017.** Alternate modes of photosynthate transport in the alternating  
797 generations of *Physcomitrella patens*. *Frontiers in Plant Science* **8**: 1956.
- 798 **Reinhard C, Schween G, Reski R, Hohe A, Egener T, Lucht JM, Holtorf H. 2004.** An improved and  
799 highly standardised transformation procedure allows efficient production of single and multiple targeted  
800 gene-knockouts in a moss, *Physcomitrella patens*. *Current Genetics* **44**: 339–347.
- 801 **Reski R. 1998.** Development, genetics and molecular biology of mosses. *Botanica Acta* **111**: 1–15.
- 802 **Reski R, Abel WO. 1985.** Induction of budding on chloronemata and caulonemata of the moss,  
803 *Physcomitrella patens*, using isopentenyladenine. *Planta* **165**: 354–358.
- 804 **Rosengren F, Cronberg N. 2014.** The adaptive background of nannandry: dwarf male distribution and  
805 fertilization in the moss *Homalothecium lutescens*. *Biological Journal of the Linnean Society* **113**: 74–  
806 84.
- 807 **Rosengren F, Cronberg N, Hansson B. 2016.** Balance between inbreeding and outcrossing in a  
808 nannandrous species, the moss *Homalothecium lutescens*. *Heredity* **116**: 107–113.
- 809 **Ruiz-Molina N, Parsons J, Schroeder S, Posten C, Reski R, Decker EL. 2022.** Process engineering  
810 of biopharmaceutical production in moss bioreactors *via* model-based description and evaluation of  
811 phytohormone impact. *Frontiers in Bioengineering and Biotechnology* **10**: 837965.
- 812 **Santner A, Estelle M. 2009.** Recent advances and emerging trends in plant hormone signalling. *Nature*  
813 **459**: 1071–1078.
- 814 **Santos WL, Pôrto KC, Pinheiro F 2022.** Sex-specific differences in reproductive life-history traits of  
815 the moss *Weissia jamaicensis*. *American Journal of Botany* **109**: 645–654.

- 816 **Sauer M, Kleine-Vehn J. 2019.** PIN-FORMED and PIN-LIKES auxin transport facilitators.  
817 *Development* **146**: dev168088.
- 818 **Schaefer DG, Zrýd J-P. 2001.** The moss *Physcomitrella patens*, now and then. *Plant Physiology* **127**:  
819 1430–1438.
- 820 **Schween G, Fleig S, Reski R. 2002.** High-throughput-PCR screen of 15,000 transgenic *Physcomitrella*  
821 plants. *Plant Molecular Biology Reporter* **20**: 43–47.
- 822 **Sonnhammer EL, von Heijne G, Krogh A. 1998.** A hidden Markov model for predicting  
823 transmembrane helices in protein sequences. *Proc Int Conf Intell Syst Mol Biol* **6**: 175–182.
- 824 **Stark LR, Stephenson AG. 1983.** Reproductive biology of *Entodon cladorrhizans* (Bryopsida,  
825 Entodontaceae). II. Resource-limited reproduction and sporophyte abortion. *Systematic Botany* **8**: 389–  
826 394.
- 827 **Stark LR, Mishler BD, McLetchie DN. 2000.** The cost of realized sexual reproduction: assessing  
828 patterns of reproductive allocation and sporophyte abortion in a desert moss. *American Journal of*  
829 *Botany* **87**: 1599–1608.
- 830 **Stark LR, Brinda JC, McLetchie DN. 2009.** An experimental demonstration of the cost of sex and a  
831 potential resource limitation on reproduction in the moss *Pterygoneurum* (Pottiaceae). *American*  
832 *Journal of Botany* **96**: 1712–1721.
- 833 **Stark LR, McLetchie DN, Eppley SM. 2010.** Sex ratios and the shy male hypothesis in the moss *Bryum*  
834 *argenteum* (Bryaceae). *The Bryologist* **113**: 788–797.
- 835 **Suarez SS. 2008.** Control of hyperactivation in sperm. *Human Reproduction Update* **14**: 647–657.
- 836 **Szovenyi P, Ullrich KK, Rensing SA, Lang D, van Gessel N, Stenoien HK, Conti E, Reski R. 2017.**  
837 Selfing in haploid plants and efficacy of selection: Codon usage bias in the model moss *Physcomitrella*  
838 *patens*. *Genome Biology and Evolution* **9**: 1528–1546.
- 839 **Takechi K, Nagase H, Furuya T, Hattori K, Sato Y, Miyajima K, Higuchi T, Matsuda R, Takio S,**  
840 **Tsukaya H, et al. 2021.** Two atypical ANGUSTIFOLIA without a plant-specific C-terminus regulate  
841 gametophore and sporophyte shapes in the moss *Physcomitrium (Physcomitrella) patens*. *Plant Journal*  
842 **105**: 1390–1399.
- 843 **Thelander M, Landberg K, Sundberg E. 2018.** Auxin-mediated developmental control in the moss  
844 *Physcomitrella patens*. *Journal of Experimental Botany* **69**: 277–290.
- 845 **Thelander M, Landberg K, Sundberg E. 2019.** Minimal auxin sensing levels in vegetative moss stem  
846 cells revealed by a ratiometric reporter. *New Phytologist* **224**: 775–788.
- 847 **Ung KL, Winkler M, Schulz L, Kolb M, Janacek DP, Dedic E, Stokes DL, Hammes UZ, Pedersen**  
848 **BP. 2022.** Structures and mechanism of the plant PIN-FORMED auxin transporter. *Nature*,  
849 <https://doi.org/10.1038/s41586-022-04883-y>
- 850 **Uzawa M, Higuchi M. 2010.** Comparative development of the sporophyte–gametophyte junction in six  
851 moss species. *Journal of Plant Research* **123**: 777–787.
- 852 **Viaene T, Landberg K, Thelander M, Medvecka E, Pederson E, Feraru E, Cooper ED, Karimi M,**  
853 **Delwiche CF, Ljung K, et al. 2014.** Directional auxin transport mechanisms in early diverging land  
854 plants. *Current Biology* **24**: 2786–2791.
- 855 **Weijers D, Wagner D. 2016.** Transcriptional responses to the auxin hormone. *Annual Review of Plant*  
856 *Biology* **67**: 539–574.

- 857 **Wiedemann G, van Gessel N, Köchl F, Hunn L, Schulze K, Maloukh L, Nogué F, Decker EL,**  
858 **Hartung F, Reski R. 2018.** RecQ helicases function in development, DNA repair, and gene targeting  
859 in *Physcomitrella patens*. *Plant Cell* **30**: 717–736.
- 860 **Żabka A, Polit JT, Winnicki K, Paciorek P, Juszcak J, Nowak M, Maszewski J. 2016.** PIN2-like  
861 proteins may contribute to the regulation of morphogenetic processes during spermatogenesis in *Chara*  
862 *vulgaris*. *Plant Cell Reports* **35**: 1655–1669.
- 863 **Zhang Y, Rodriguez L, Li L, Zhang X, Friml J. 2020.** Functional innovations of PIN auxin  
864 transporters mark crucial evolutionary transitions during rise of flowering plants. *Science Advances* **6**:  
865 eabc8895.

866 **Supporting Information**

867 Supplemental Figure S1: Genetic structure and protein motifs of Physcomitrella PIN proteins

868 Supplemental Figure S2: Alignments of protein sequences of Physcomitrella and Arabidopsis PIN  
869 proteins

870 Supplemental Figure S3: Expression data of Physcomitrella PIN genes from PEATmoss database

871 Supplemental Figure S4: Molecular evaluation of *pinCPromCit*

872 Supplemental Figure S5: Molecular analysis of Physcomitrella *pinC* mutant lines

873 Supplemental Figure S6: Phenotypical characterization of vegetative tissue for Physcomitrella wild type  
874 (WT) and *pinC* mutant lines.

875 Supplemental Figure S7: Calcium concentration in Physcomitrella spermatozoids

876 Supplemental Figure S8: Quality control RNAseq

877 Supplemental Figure S9: Proof of *PpPINC* mutation in *pinC#29*

878 Supplemental Figure S10: Size of spore capsules and spore germination rate

879 Supplemental Figure S11: Spore capsule numbers

880 Supplemental Table 1: Primers used in Physcomitrella WT and mutant lines

881 Supplemental Table 2: Differentially expressed genes in Physcomitrella WT and mutant

882 Supplemental Table 3: All DEG experiments, including table of single genes already identified in other  
883 publications

884 a)

885

| Gene          | Exon 1 | Intron 1 | Exon 2 | Intron 2 | Exon 3 | Intron 3 | Exon 4 | Intron 4 | Exon 5 | Intron 5 | Exon 6 |
|---------------|--------|----------|--------|----------|--------|----------|--------|----------|--------|----------|--------|
| Pp3c_23_10200 | 1465   | 263      | 289    | 208      | 86     | 187      | 158    | 141      | 77     | 178      | 67     |
| Pp3c24_2970   | 1462   | 258      | 292    | 203      | 86     | 195      | 158    | 139      | 77     | 191      | 67     |
| Pp3C10_24880  | 1417   | 110      | 292    | 209      | 86     | 148      | 158    | 171      | 77     | 133      | 67     |



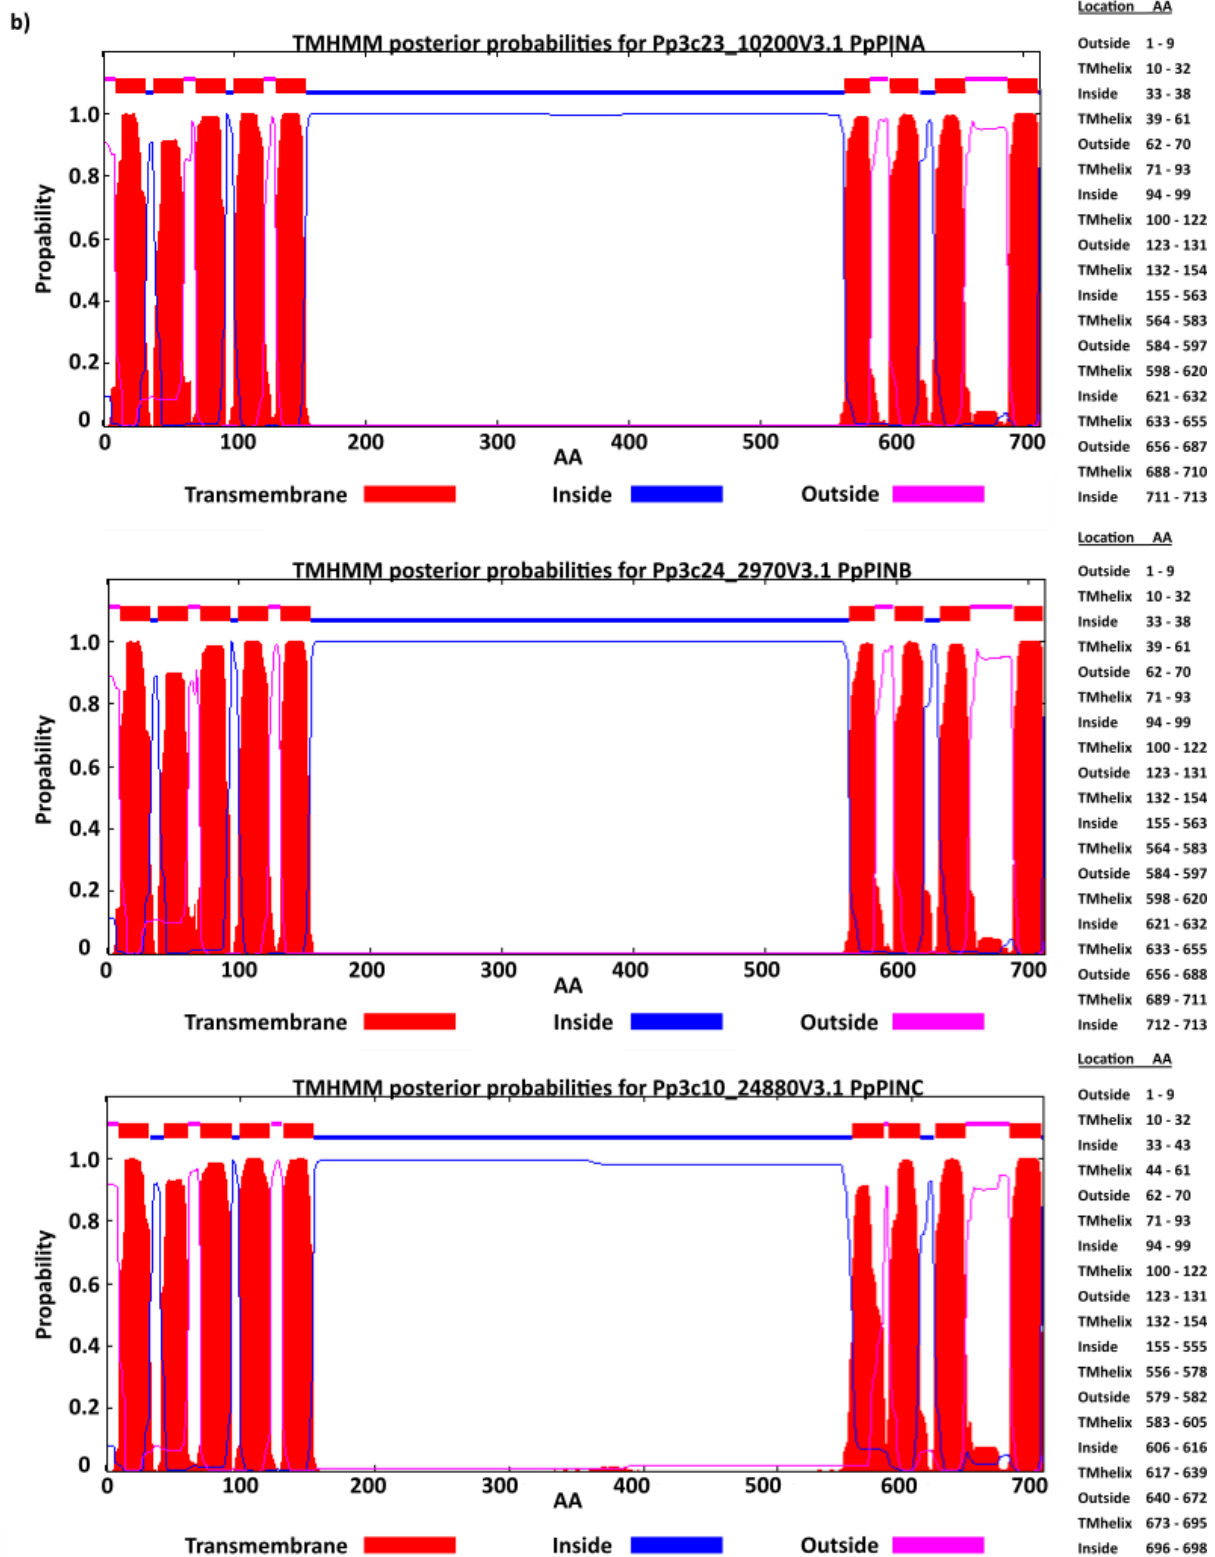

886

887 **Supplemental Figure S1: Genetic structure and protein motifs of Physcomitrella PIN**  
 888 **proteins.** a) Genetic structure of canonical Physcomitrella PIN genes, length of exons and  
 889 introns in base pairs (bp) b) Protein motifs of three Physcomitrella PIN proteins assessed with  
 890 TMHMM2.0 using the DTU Health Tech online tool (Krogh *et al.*, 2001).

891 **a)**  
892 PpPINA HL and PpPINB HL  
893  
894 Length: 409  
895 Identity: 353/409 (86.3%)  
896 Similarity: 374/409 (91.4%)  
897 Gaps: 2/409 (0.5%)  
898 Score: 1819.0  
899

|     |          |     |                                                      |     |
|-----|----------|-----|------------------------------------------------------|-----|
| 900 | PINALOOP | 1   | AAKILIMQQFPENAASIVSFKVDSVMSLDGREPVLTEAEIGDDGKLVK     | 50  |
| 901 |          |     |                                                      |     |
| 902 | PINBLOOP | 1   | AAKILIMQQFPENAGSIVSFKVDSVMSLDGREPVLTEAEIGDDGKLVK     | 50  |
| 903 |          |     |                                                      |     |
| 904 | PINALOOP | 51  | VRRSVSSRSQGMHSAHSMSSKALTPRPSNLTGAEIYSMHSSVNLTPRD     | 100 |
| 905 |          |     |                                                      |     |
| 906 | PINBLOOP | 51  | VRRSVSSRSQGMHSAHSMSSKALTPRPSNLTGAEIYSMHSSVNLTPRD     | 100 |
| 907 |          |     |                                                      |     |
| 908 | PINALOOP | 101 | SSFNQGEFHSMSQRSPhRQSNFDTSDVYSLQSSRGPTPRSSNFNEENSK    | 150 |
| 909 |          |     |                                                      |     |
| 910 | PINBLOOP | 101 | SSFNQGEYFSMMAQRSPhRQSNFDISDVYSLQSSRGPTPRTSNFNEENSK   | 150 |
| 911 |          |     |                                                      |     |
| 912 | PINALOOP | 151 | DIHTHHRGLNMNSPRFAPPLYRNGMGARMFTPRPGLGGIGVPGTDCGTGHG  | 200 |
| 913 |          |     | :                                                    |     |
| 914 | PINBLOOP | 151 | DMHTHHRGLNLTSPRFVPPLYRNVAGGRMFMPRTGLGGLPVHGNDDPTGHG  | 200 |
| 915 |          |     |                                                      |     |
| 916 | PINALOOP | 201 | TLSTLGAPGMGPDGRTIYPGSQTAINILTLGGAANVNATAPSTAVNTQIV   | 250 |
| 917 |          |     | :                                                    |     |
| 918 | PINBLOOP | 201 | SLSTLGTTPGMGPDGRTIYPGSQTAISLVTPGGTGNI-ATPLSSSLNTQIV  | 249 |
| 919 |          |     |                                                      |     |
| 920 | PINALOOP | 251 | NPVYSPQASQIAKKVKDPKAS-PRADEDAKELHMFVWSANASPVSEAGLHV  | 300 |
| 921 |          |     |                                                      |     |
| 922 | PINBLOOP | 250 | NPVYSPRASQIAKKVKDTRTS-PKSDEDAKELHMFVWSANASPVSEAGLHV  | 299 |
| 923 |          |     |                                                      |     |
| 924 | PINALOOP | 301 | FGGNDTSANLQQRFDPKKEVRMLVHPQLDRGLAAASPRTYDEYTRDFDFSG  | 350 |
| 925 |          |     |                                                      |     |
| 926 | PINBLOOP | 300 | FGGNDTSANLHQSFDPKKEVRMLVHPQSLDRHPEANPRTYDNYAQEDDFSG  | 349 |
| 927 |          |     |                                                      |     |
| 928 | PINALOOP | 351 | NRNDLKLELDLDKGPRLD-KFGSTSTAEALTPKLAEDEAKKSMPPSAVMIK  | 399 |
| 929 |          |     |                                                      |     |
| 930 | PINBLOOP | 350 | NRNDLKLELDLDKGPRLDNKFGSTSTAEALTPKVPFEDEAKKSMPPSAVMIK | 399 |
| 931 |          |     |                                                      |     |
| 932 | PINALOOP | 400 | LIAVMTFRK                                            | 408 |
| 933 |          |     |                                                      |     |
| 934 | PINBLOOP | 400 | LIAVMTFRK                                            | 408 |
| 935 |          |     |                                                      |     |

936  
937 PpPINA HL and PpPINC HL  
938  
939 Length: 411  
940 Identity: 266/411 (64.7%)  
941 Similarity: 316/411 (76.9%)  
942 Gaps: 21/411 (5.1%)  
943 Score: 1312.5  
944

|     |          |     |                                                     |     |
|-----|----------|-----|-----------------------------------------------------|-----|
| 945 | PINALOOP | 1   | AAKILIMQQFPENAASIVSFKVDSVMSLDGREPVLTEAEIGDDGKLVK    | 50  |
| 946 |          |     | :                                                   |     |
| 947 | PINCLOOP | 1   | AARILIMHRFPENAASIVSFKVESVMSLDGDPVLTAEAFRNDGKLVHR    | 50  |
| 948 |          |     |                                                     |     |
| 949 | PINALOOP | 51  | VRRSVSSRSQGMHSAHSMSSKALTPRPSNLTGAEIYSMHSSVNLTPRD    | 100 |
| 950 |          |     |                                                     |     |
| 951 | PINCLOOP | 51  | VRRSVSSRSQGVHSANHSIPSSKALTPRASNLSNAEIYSMNSSVNLTPRG  | 100 |
| 952 |          |     |                                                     |     |
| 953 | PINALOOP | 101 | SSFNQGEFHSMSQRSPhRQSNFDTSDVYSLQSSRGPTPRSSNFNEENSK   | 150 |
| 954 |          |     |                                                     |     |
| 955 | PINCLOOP | 101 | SSFDRGEDCSTMAHRDPNRKSNFDTSDIYSLQSSRGPTPRNSNFNEENSK  | 150 |
| 956 |          |     |                                                     |     |
| 957 | PINALOOP | 151 | DIHTHHRGLNMNSPRFAPPLYRNGMGARMFTPRPGLGGIGVPGTDCGTGHG | 200 |
| 958 |          |     | :  :                                                |     |
| 959 | PINCLOOP | 151 | EVHNHRGALNVNIPRFAPPLYRNGSGGRLFMARSDLGGVGALSFEPAAH-  | 199 |
| 960 |          |     |                                                     |     |
| 961 | PINALOOP | 201 | TLSTLGAPGMGPDGRTIYPGSQTAINILTLGGAANVNATAPSTAVNTQIV  | 250 |
| 962 |          |     | .                                                   |     |
| 963 | PINCLOOP | 200 | -----SMGPDGRTIYPG-----ITVVT-----NSVAAVPASGVSTHII    | 232 |
| 964 |          |     |                                                     |     |
| 965 | PINALOOP | 251 | NPVYSPQASQIAKKVKDPKAS-PRADEDAKELHMFVWSANASPVSEAGLH  | 299 |

```

966      |||:|.:.||:|.|.:.||:| | :.:.||:|.|.:.||:|.:.||:|.:.||
967 PINCLOOP      233 NPVFSPLVSVQVAKKVNDRPRASIPKTDDEEAKELHMFVSSANPTSVSEGELH      282
968
969 PINALOOP      300 VFGGNDTSANLQQRFPDPEKVRMLVHPQLDRGL-AAASPRTYDEYTREDFS      348
970      |||:|.:.||:|.|.:.||:| | :.:.||:|.|.:.||:|.:.||:|.:.||
971 PINCLOOP      283 VFGGSDISINLQQSVNPKELHVHVHPQSEHHLPGAANHKQTQDEHARQGF      332
972
973 PINALOOP      349 FGNRNDLKLEDLDDKDGPRLD-KFGSTSTAELTPKLAEDEAKKSMPPSAVM      397
974      |||:|.:.||:|.|.:.||:| | :.:.||:|.|.:.||:|.:.||:|.:.||
975 PINCLOOP      333 FGNRRDLKVEDVDNNGSKLDKKFRSILTAELAPKHPMDEGKTSMPSSVM      382
976
977 PINALOOP      398 IKLIAVMTFRK      408
978      |||.|||||
979 PINCLOOP      383 IKLICVMTFRK      393
980

```

981 PpPINB HL and PpPINC HL

```

982
983 Length: 410
984 Identity:      264/410 (64.4%)
985 Similarity:   315/410 (76.8%)
986 Gaps:         19/410 (4.6%)
987 Score: 1306.0
988
989 PINBLOOP      1 AAKILIMQFPENAGSIVSFKVDSVMSLDGPEVLTAEIIGDDGKLVK      50
990      ||:|||||.:.||:|.|.:.||:| | :.:.||:|.|.:.||:|.:.||:|.:.||
991 PINCLOOP      1 AARILIMHRFPENAASIVSFKVESDVMSLDGPDVLTAEAFRNDGKLVHR      50
992
993 PINBLOOP      51 VRRSVSSRSQGMHSAHSMSSKALTPRPSNLTGAEIYSMHSSVNLTPRD      100
994      |||:|.:.||:|.|.:.||:| | :.:.||:|.|.:.||:|.:.||:|.:.||
995 PINCLOOP      51 VRRSVSSRSQGVHSANHSIPSSKALTPRASNLSNAEIIYSMNSSVNLTPRG      100
996
997 PINBLOOP      101 SSFNQGEYFSMMAQRSRPHRQSNFDISDVYSLQSSRGPTPRTSNFNEENSK      150
998      ||:|.:.||:|.|.:.||:| | :.:.||:|.|.:.||:|.:.||:|.:.||
999 PINCLOOP      101 SSFDRGEDCSTMAHRDPNRKSNFDTSDIYSLQSSRGPTPRNSNFNEENSK      150
1000
1001 PINBLOOP      151 DMHTHHRGLNLTSPRFVPPLYRNVAGGRMFMPRTGLGGLPVHGNPDTPGHG      200
1002      :|.:.||:|.|.:.||:| | :.:.||:|.|.:.||:|.:.||:|.:.||
1003 PINCLOOP      151 EVHNHRGALNVNIPRFAPPLYRNGSGGRLFMARSDLGGVGVGALSFEPAAH-      199
1004
1005 PINBLOOP      201 SLSTLGTPLGMPDGRITYPGQTAISLVTPGGTGNIATPLSSSLNTQIVN      250
1006      .||||| | | :.:.||:|.|.:.||:| | :.:.||:|.|.:.||
1007 PINCLOOP      200 -----SMGPDGRITYPG----ITVV----TNSVAAVPASGVSTHIIN      233
1008
1009 PINBLOOP      251 PVYSPRASQIAKKVDTRTS-PKSDDEAKELHMFVWSANASPVSEAGLHV      299
1010      ||:|.:.||:|.|.:.||:| | :.:.||:|.|.:.||:|.:.||:|.:.||
1011 PINCLOOP      234 PVFSPVSVQVAKKVNDRPRASIPKTDDEEAKELHMFVSSANPTSVSEGELHV      283
1012
1013 PINBLOOP      300 FGGNDTSANLHQSFPDPEKVRMLVHPQSLRHP-EANPRTYDNVAQEDFSF      348
1014      ||:|.:.||:|.|.:.||:| | :.:.||:|.|.:.||:|.:.||:|.:.||
1015 PINCLOOP      284 FGGSDISINLQQSVNPKELHVHVHPQSEHHLPGAANHKQTQDEHARQGF      333
1016
1017 PINBLOOP      349 GNRNDLKLEDLDDKDGPRLDNFKGSTSTAELTPKVPDEAKKSMPPSAVMI      398
1018      |||.||:|.|.:.||:| | :.:.||:|.|.:.||:|.:.||:|.:.||
1019 PINCLOOP      334 GNRRLKVEDVDNNGSKLDKKFRSILTAELAPKHPMDEGKTSMPSSVMI      383
1020
1021 PINBLOOP      399 KLIAVMTFRK      408
1022      |||.|||||
1023 PINCLOOP      384 KLICVMTFRK      393
1024

```

1025 PpPINA TM1 and PpPINB TM1

```

1026
1027 Length: 155
1028 Identity:      149/155 (96.1%)
1029 Similarity:   153/155 (98.7%)
1030 Gaps:         0/155 (0.0%)
1031 Score: 792.0
1032
1033 PINATM1      1 MINGHDIYNVLSAMVPLVAMMLAYGSVKWWGILTPQQCGGINRFVSIFA      50
1034      |||:|.:.||:|.|.:.||:| | :.:.||:|.|.:.||:|.:.||:|.:.||
1035 PINBTM1      1 MINGHDIYNVLSAMVPLVAMMLAYGSVKWWGILTPQQCGGINRFVSIFA      50
1036
1037 PINATM1      51 VPLLSFQFISGNNPYAMNFKFIAADAVSKVLVLLCGLWARYAKRGSLEW      100
1038      |||:|.:.||:|.|.:.||:| | :.:.||:|.|.:.||:|.:.||:|.:.||
1039 PINBTM1      51 VPLLSFQFISGNNPYAMNFRFIAADAVSKVFLVLLCGLWARYSKRGSLEW      100
1040

```









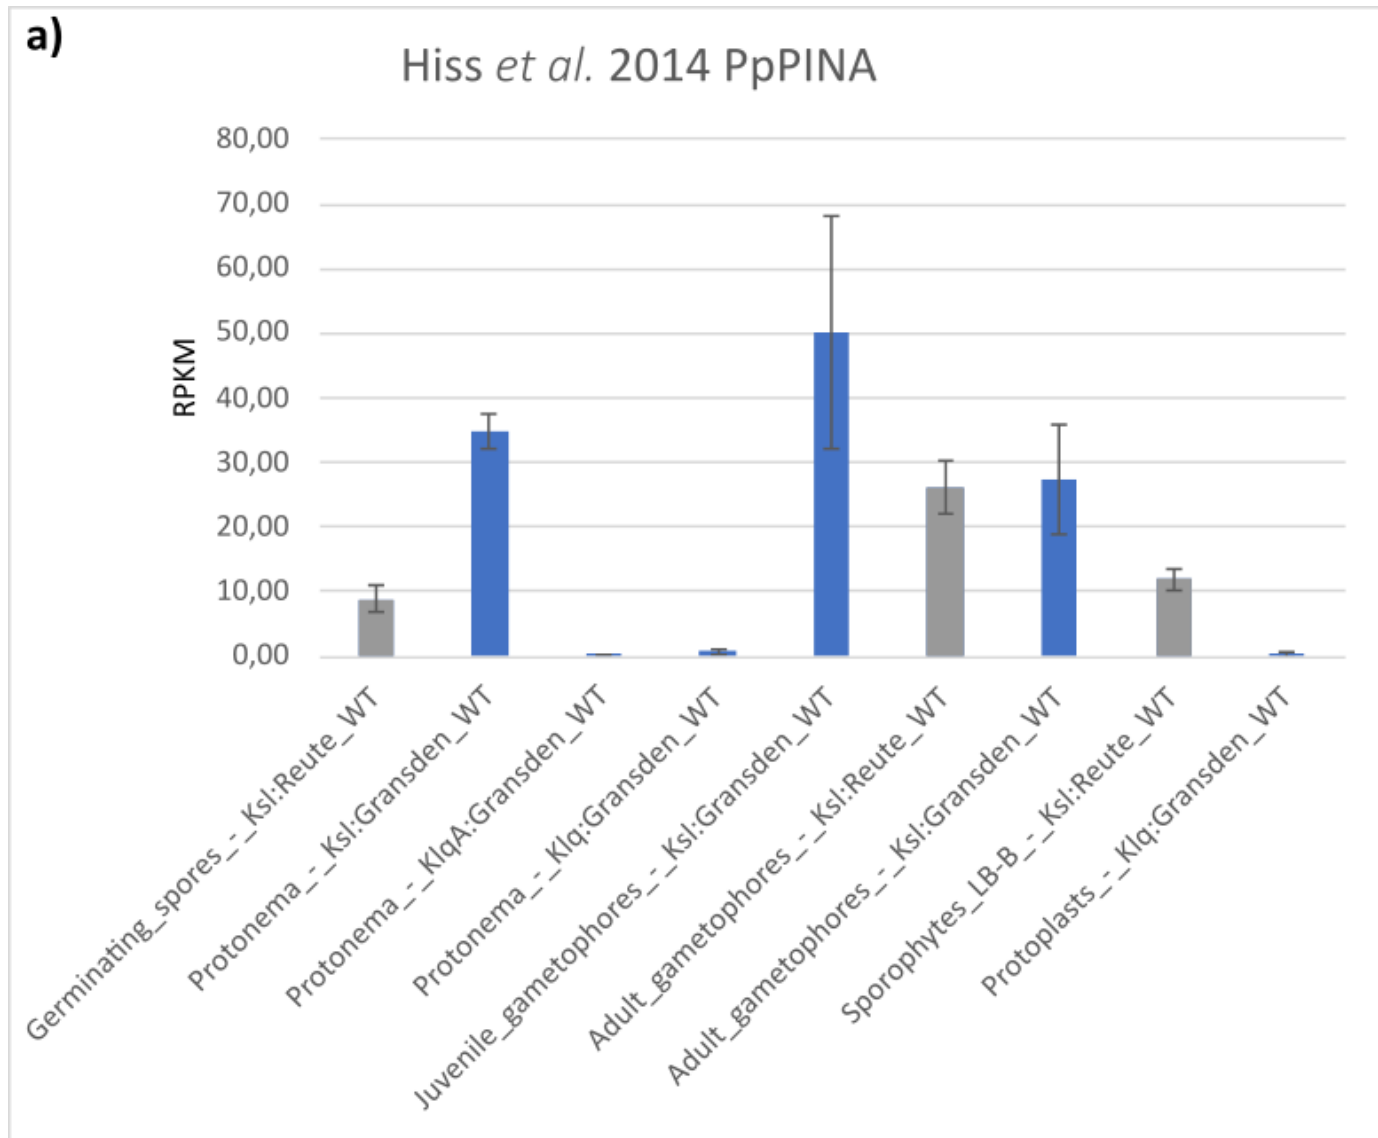

1310



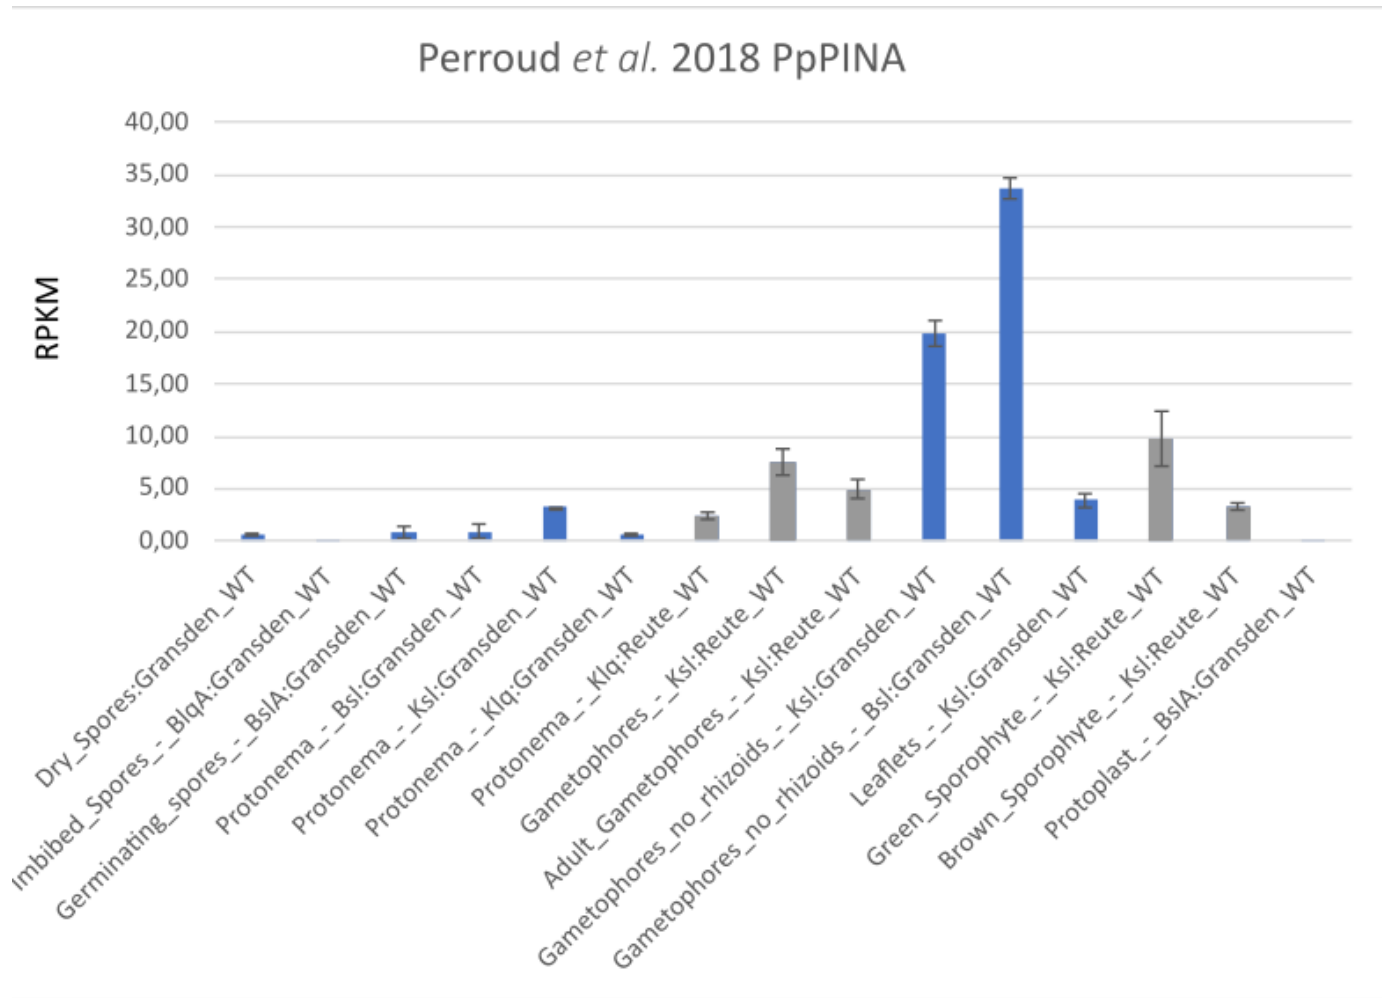

1311

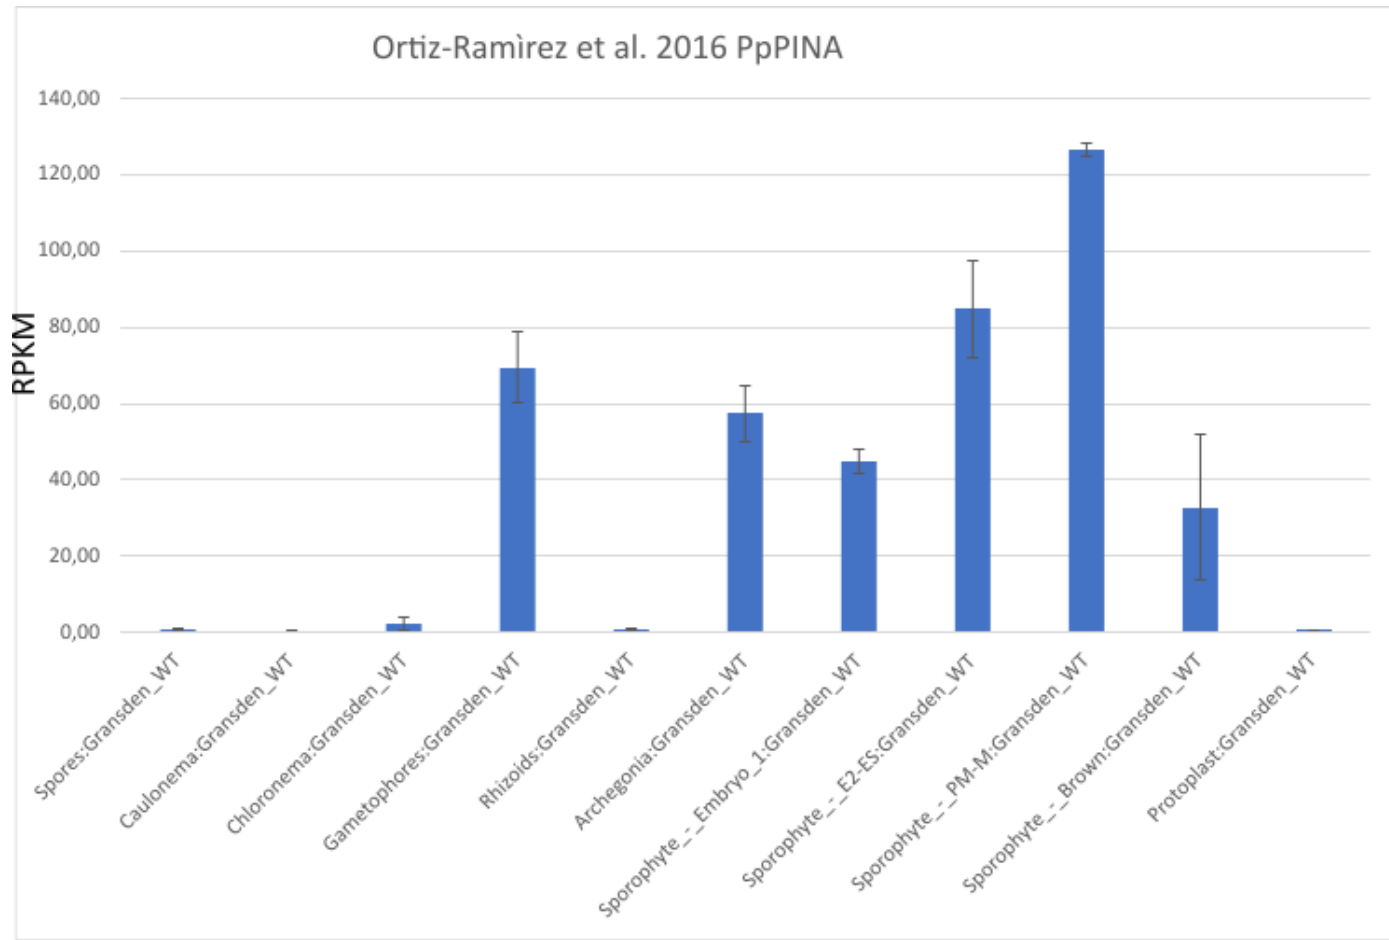

1312

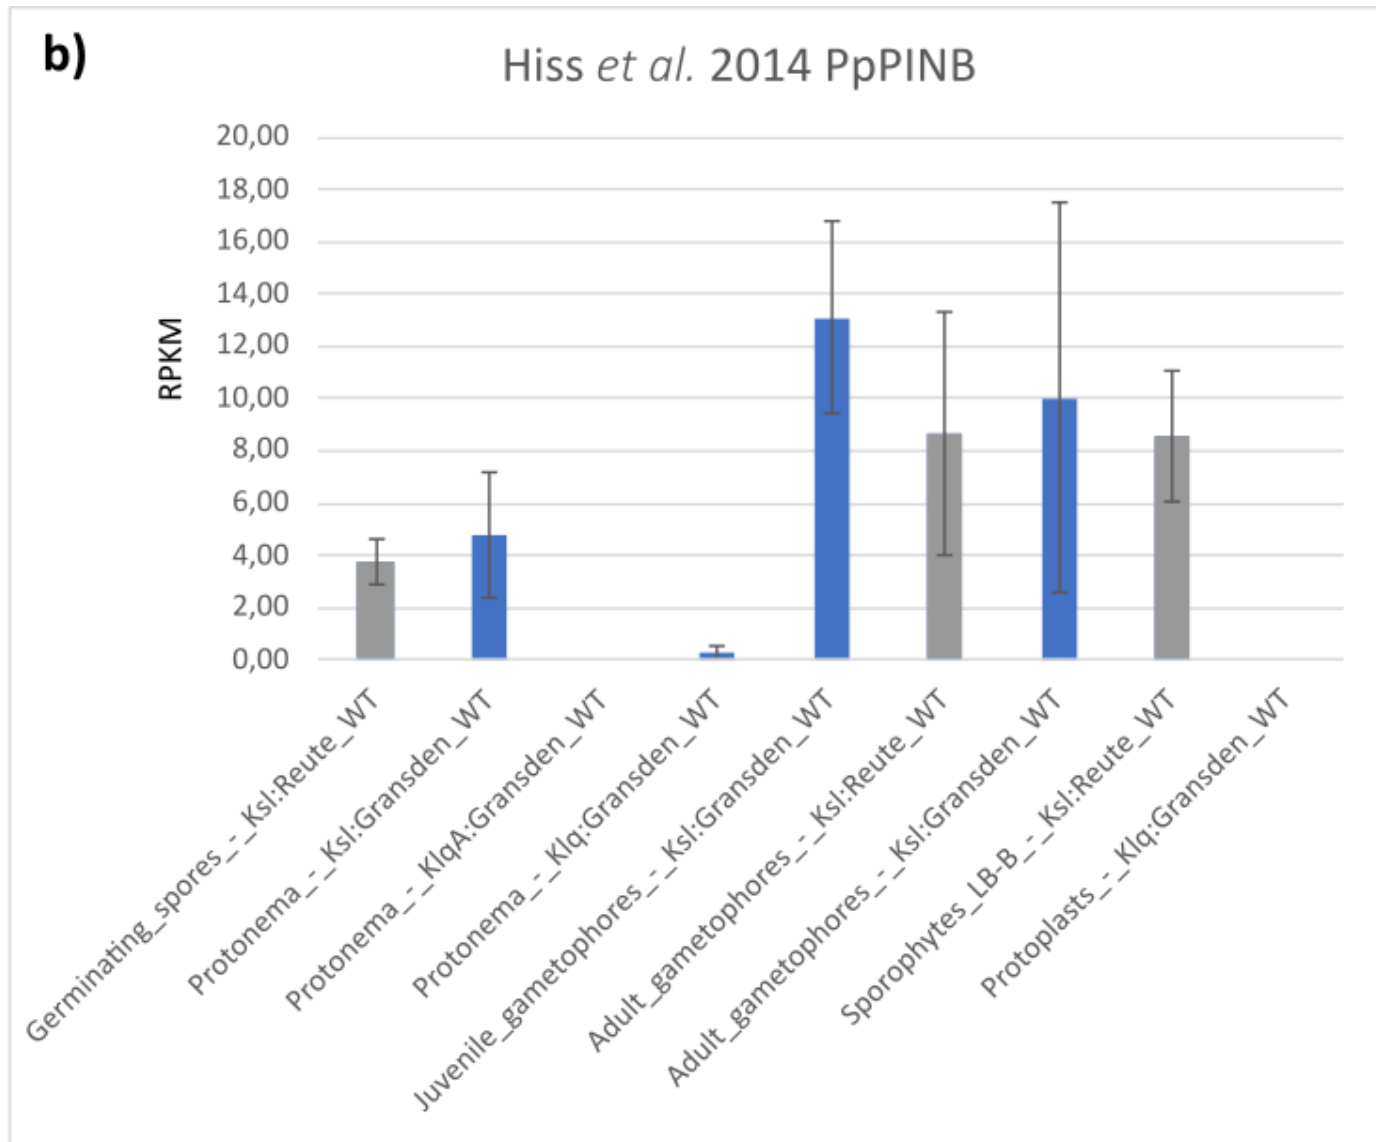

1313

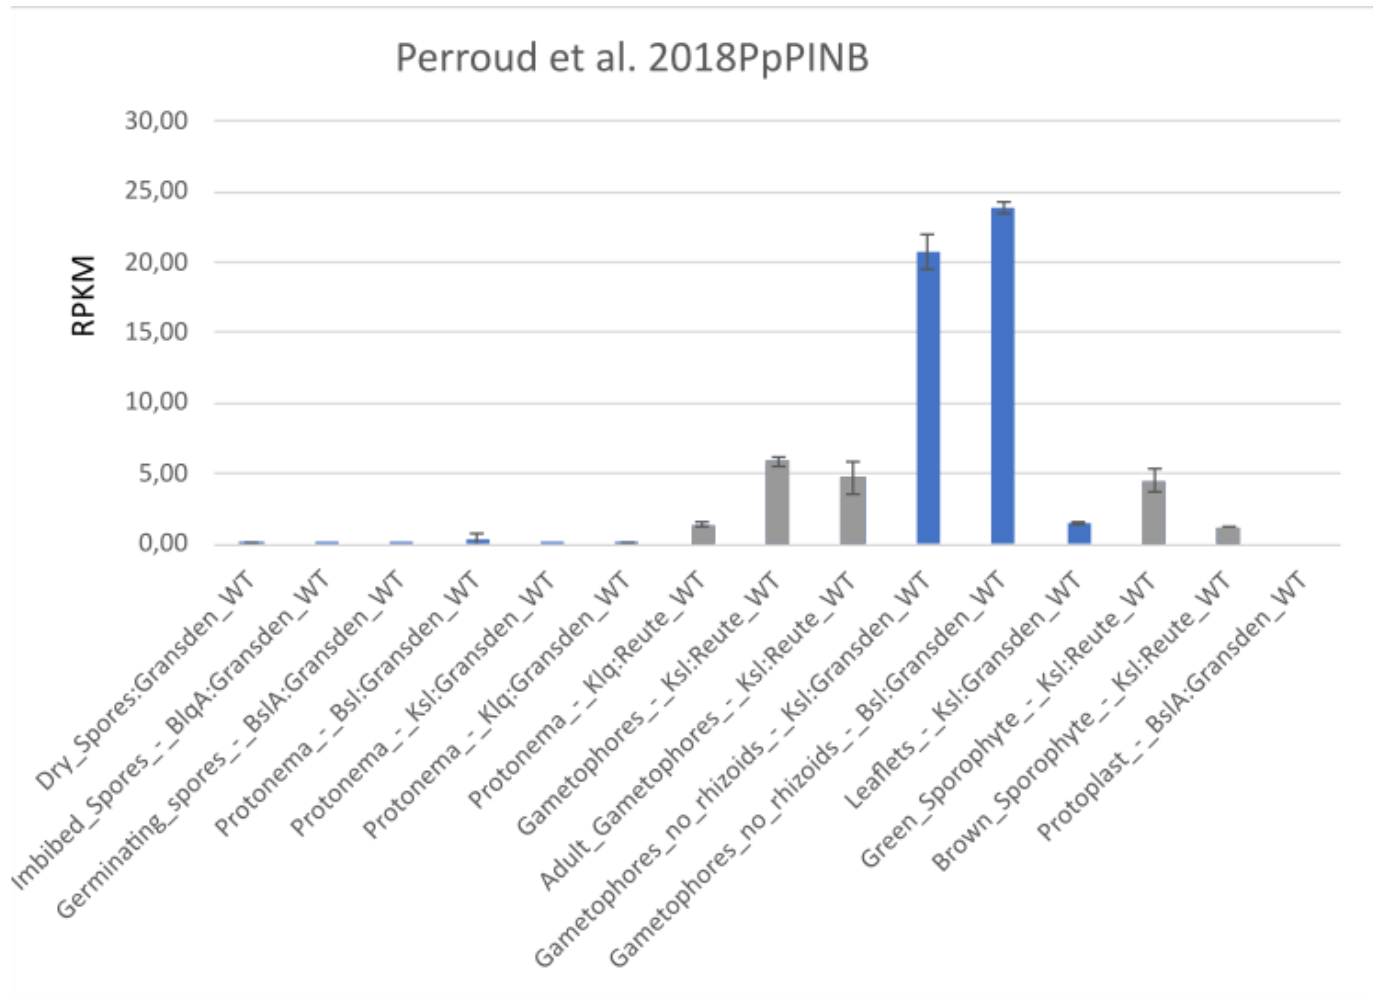

1314

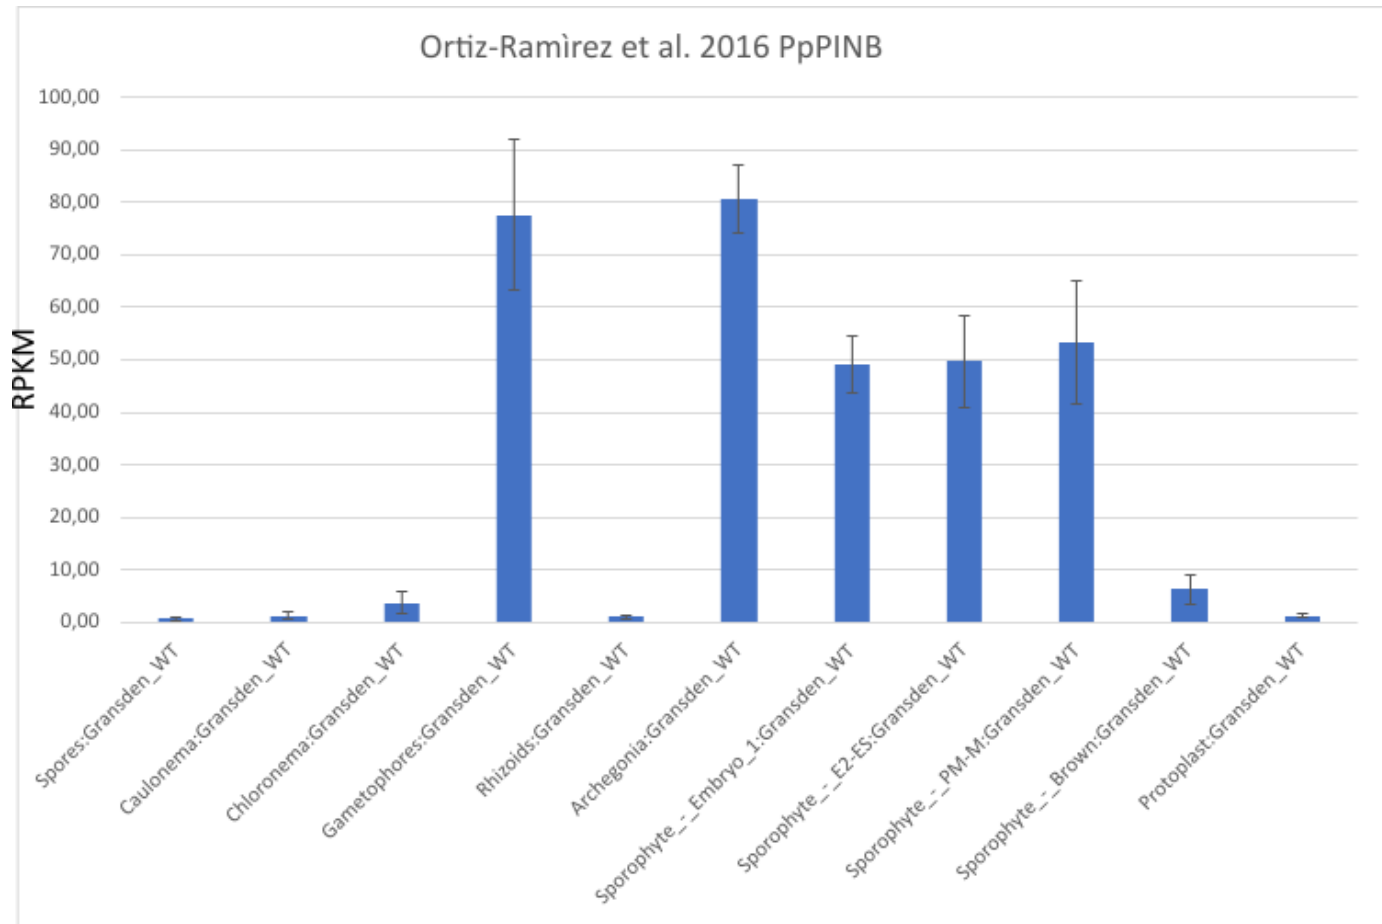

1315

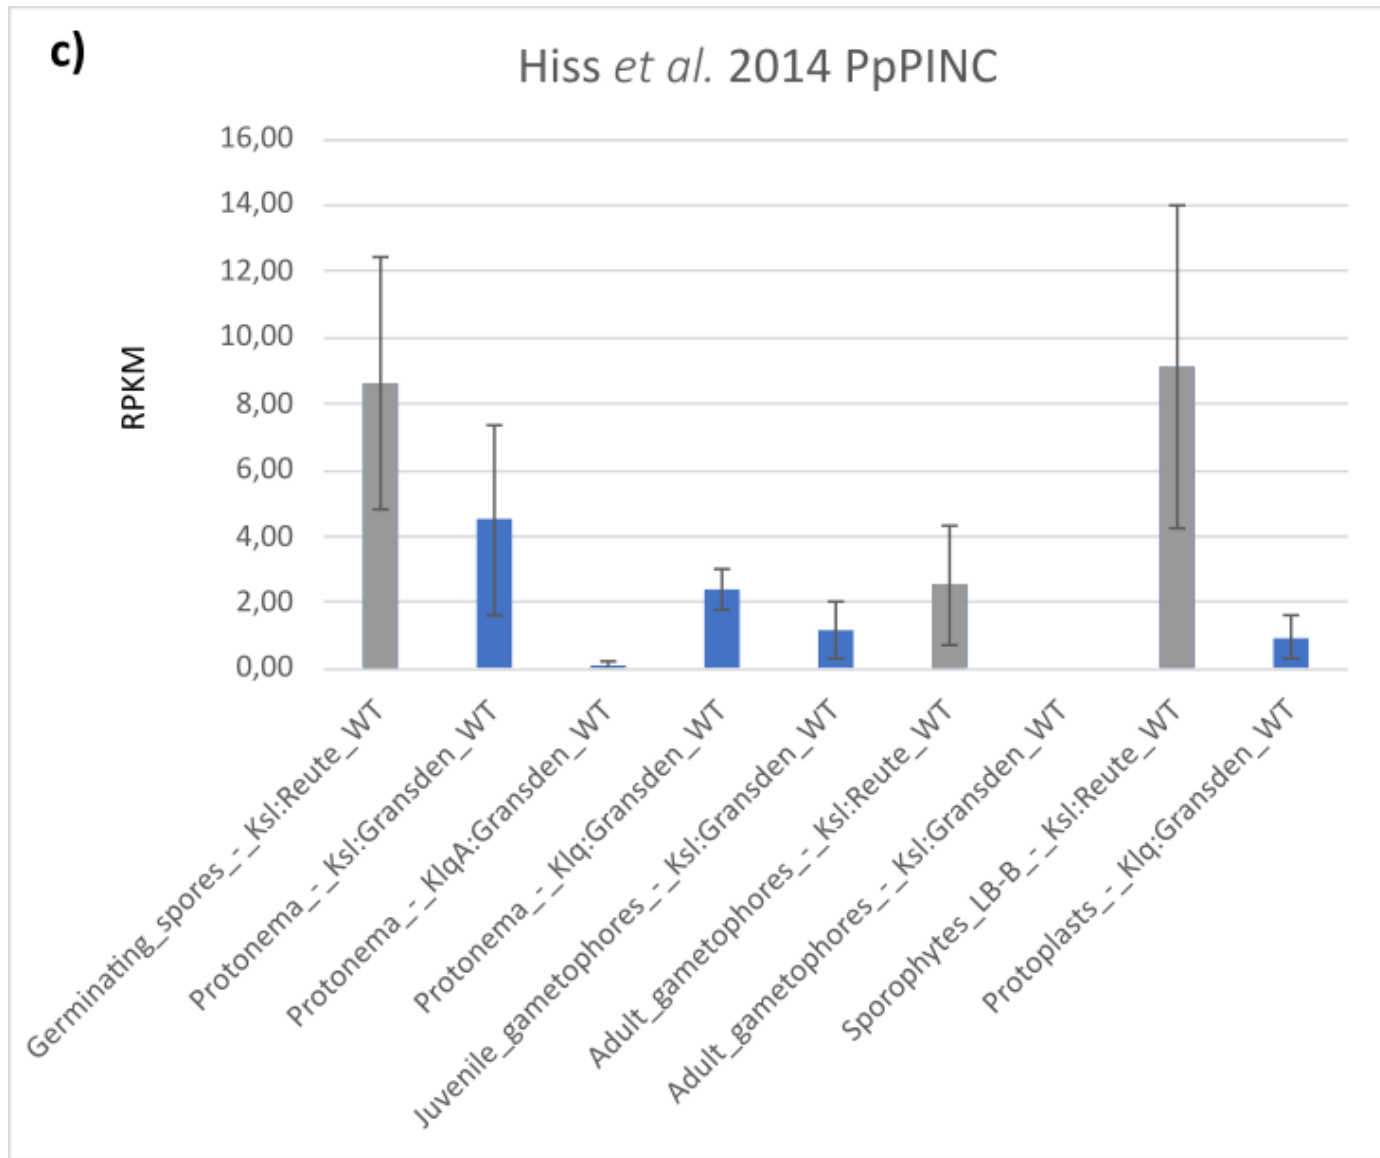

1316

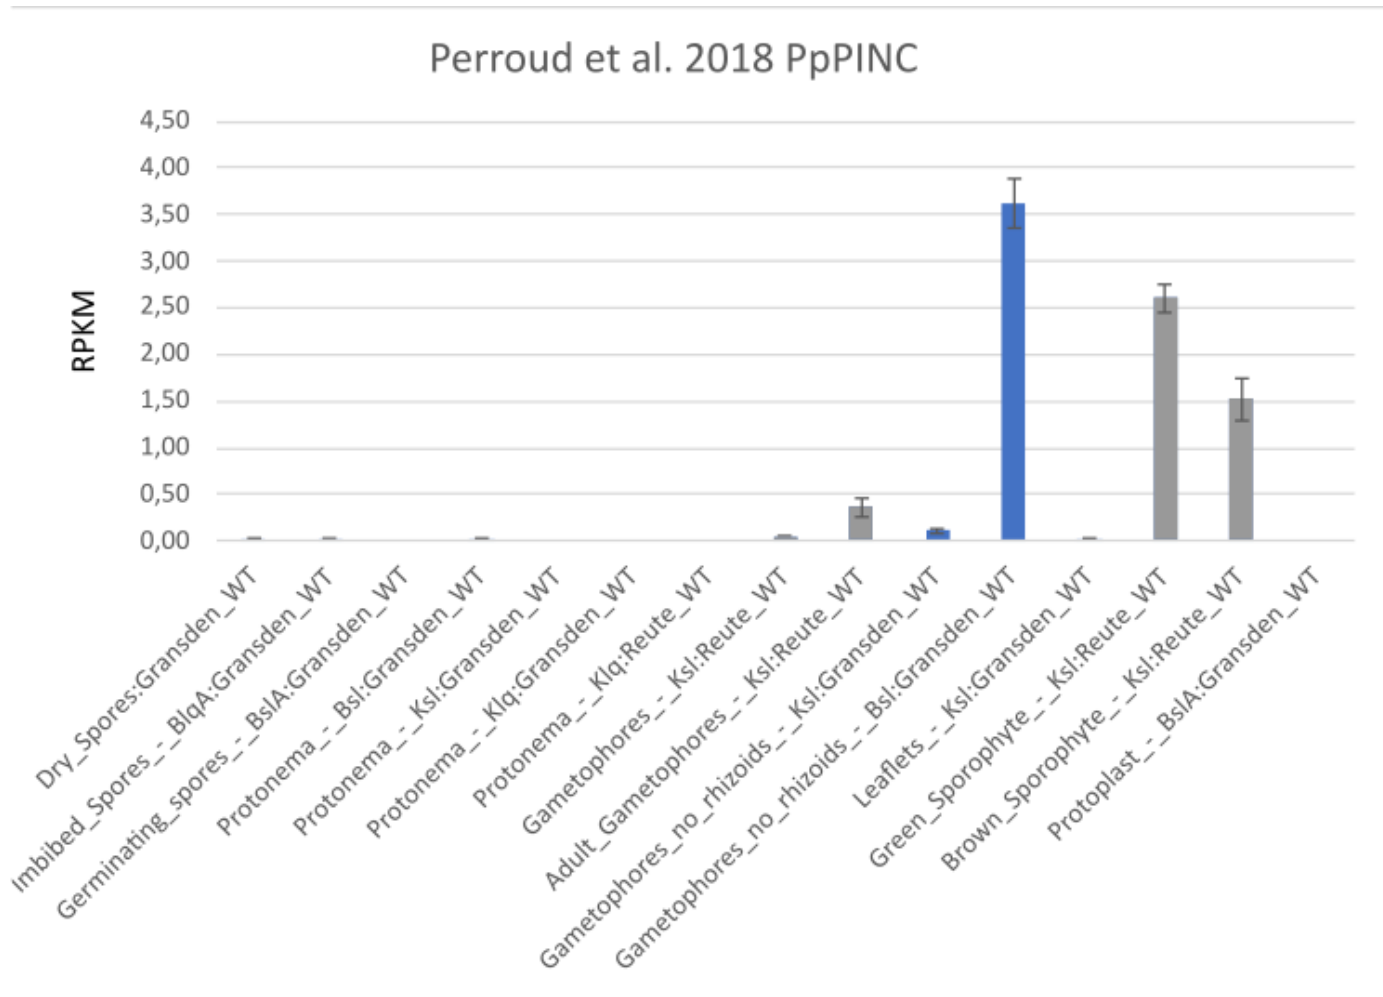

1317

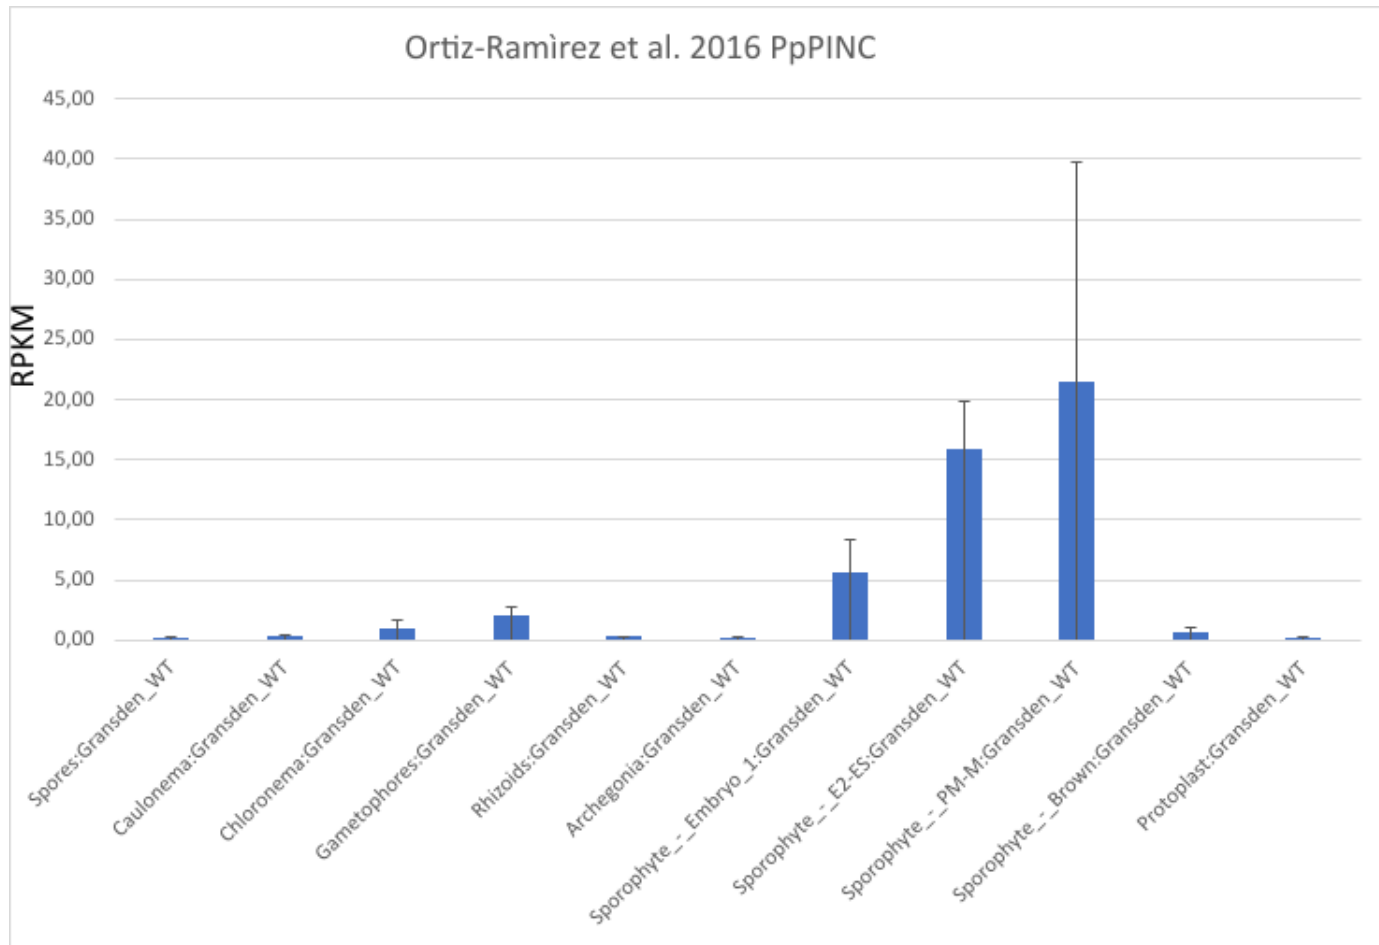

1318

1319

1320 **Supplemental Figure S3: Expression data of Physcomitrella PIN genes from**  
 1321 **PEATmoss database.** Expression of *PpPINA*, *B* and *C* in different gene expression sets  
 1322 accessed via the PEATmoss database (Fernandez-Pozo *et al.*, 2020) in the two  
 1323 Physcomitrella ecotypes Gransden (blue bars) and Reute (grey bars), used data sets: Hiss *et*  
 1324 *al.* (2014), Perroud *et al.* (2018), and Ortiz-Ramirez *et al.* (2016). a) *PpPINA* b) *PpPINB* c)  
 1325 *PpPINC*. Blq = BCD liquid, BlqA = BCD (ammonium) liquid, Bsl = BCD solid, BslA =  
 1326 BCD (ammonium) solid, Klq = Knop liquid, Ksl = Knop solid, Sporophyte LB-B = light  
 1327 brown to brown sporophyte, Sporophyte PM-M = premeiotic to meiotic green sporophyte,  
 1328 sporophyte Embryo 1= first embryo stage, sporophyte E2-ES = early developing  
 1329 sporophyte. n = 3, RPKM = reads per kilobase per million.



1330

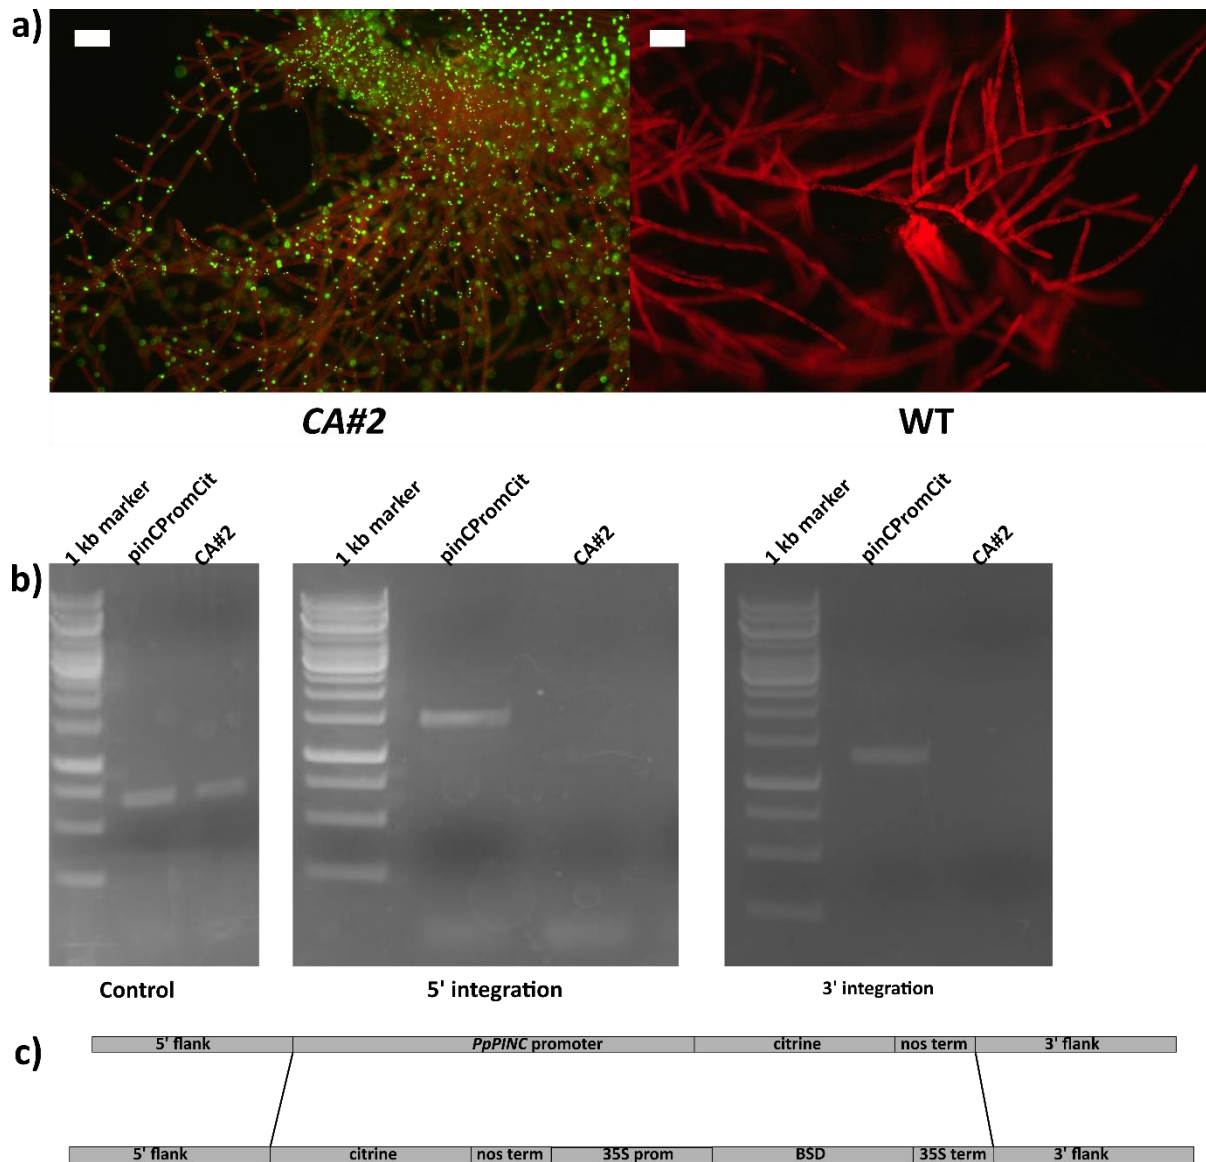

1331

1332

1333 **Supplemental Figure S4: Molecular evaluation of *pinCPromCit*.** a) Fluorescent microscopy  
 1334 pictures of CA#2, parental line of *pinCPromCit* (left) and *Physcomitrella* WT (right) protonema  
 1335 and budding gametophore, scale bar = 100  $\mu$ m. b) Control PCR using constitutive expressed  
 1336 gene *Efl $\alpha$*  for *pinCPromCit* and CA#2, 3' integration (PCR product = 1.4 kb) and 5' integration  
 1337 (PCR product = 1.5 kb) of *PpPINC* promoter construct, no PCR product for CA#2 parental line.  
 1338 c) Construct used for creating *pinCPromCit* by targeting the whole construct used in  
 1339 Wiedemann *et al.* (2018). BSD = selection marker, prom = promoter, term = terminator.

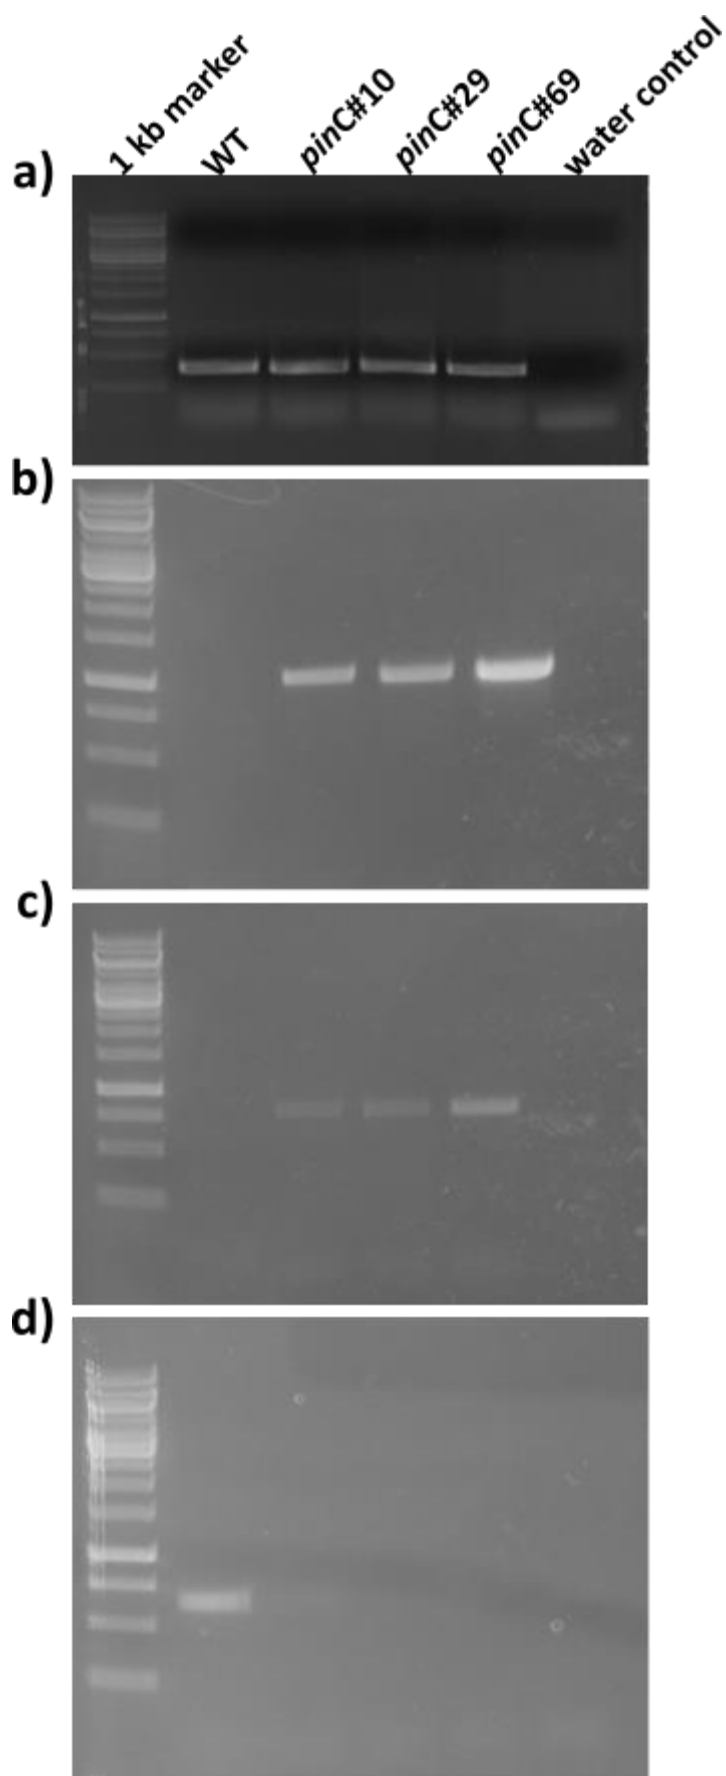

1340

1341

1342 **Supplemental Figure 5: Molecular analysis of *Physcomitrella pinC* mutant lines.** a)  
1343 Control PCR using the L21 gene (C45 primers). b) 5' integration of targeting construct (1 kb).  
1344 c) 3' integration of targeting construct (770 bp). d) RT-PCR amplifying a region from exon 3  
1345 to exon 5 (700 bp).

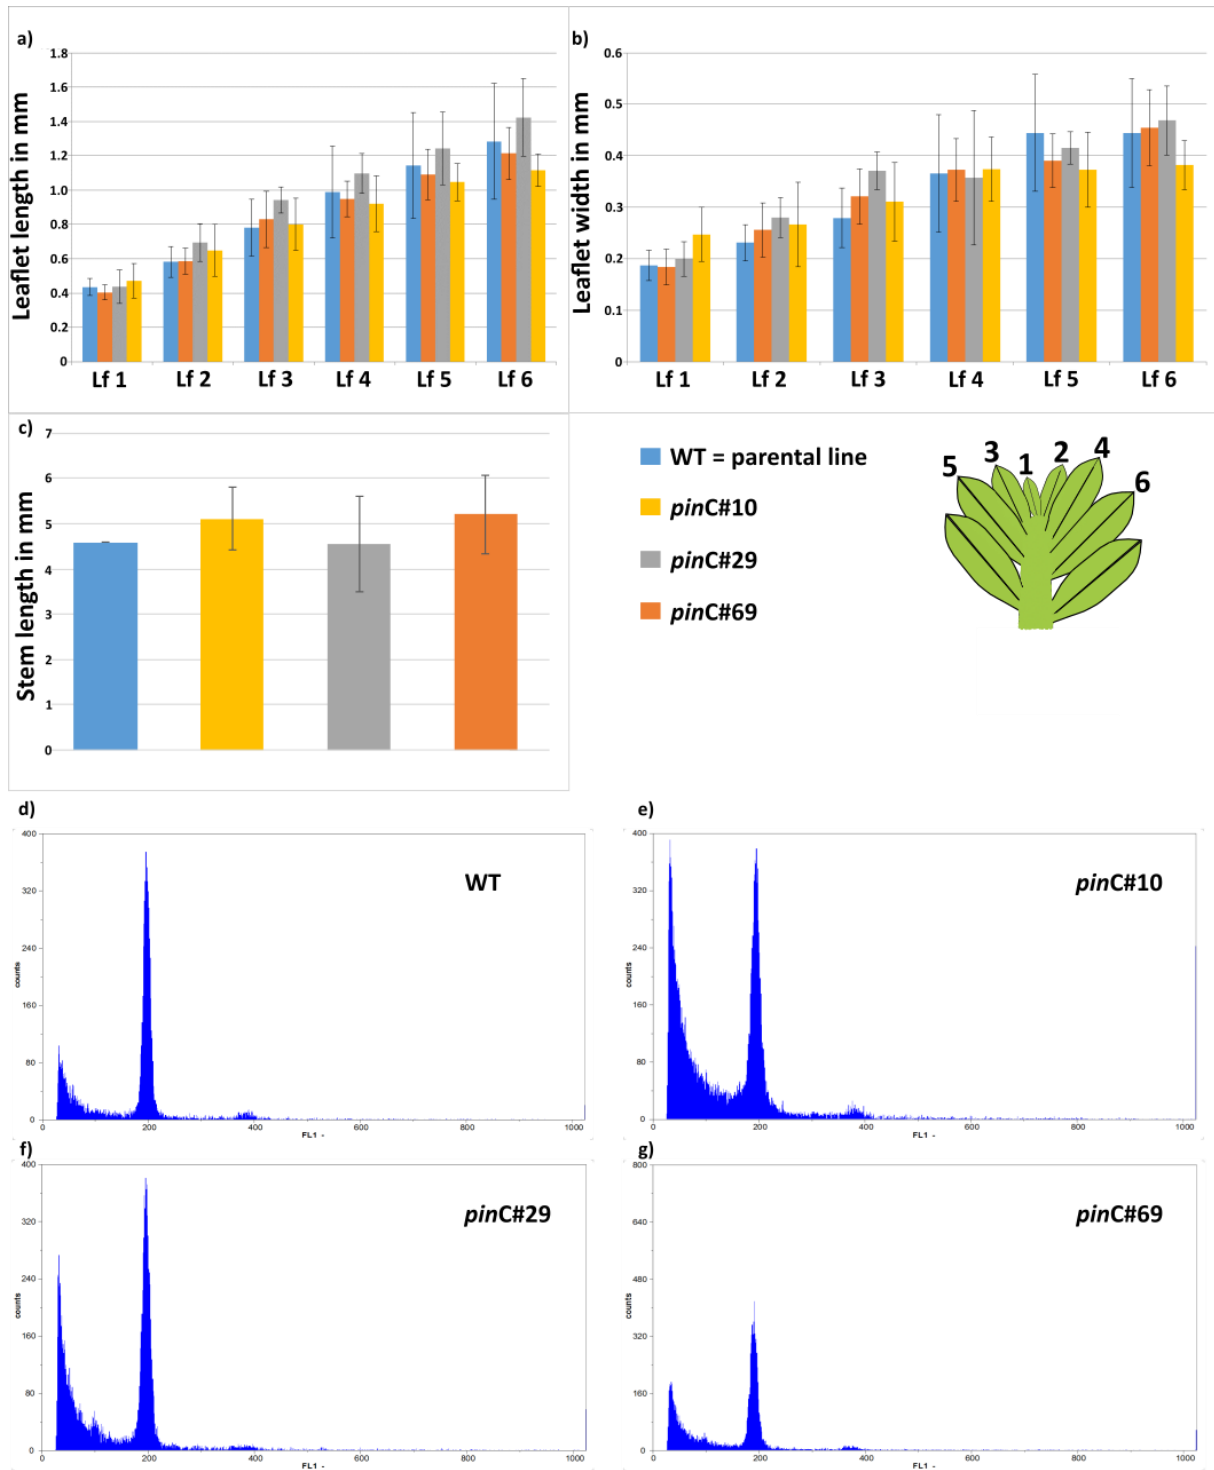

1346

1347

1348 **Supplemental Figure 6: Phenotypal characterization of vegetative tissue for**  
 1349 **Physcomitrella wild type (WT) and *pinC* mutant lines.** a) Length and b) width of the first  
 1350 first six leaves of a gametophore. c) stem length d)-g) flow cytometric measurements confirmed  
 1351 haploidy of the generated *pinC* knockouts. Number of measured leaves and stems a) + b) n = 7;  
 1352 c) WT: n = 13, *pinC#10*: n = 14, *pinC#29*: n = 16, *pinC#69*: n = 18.

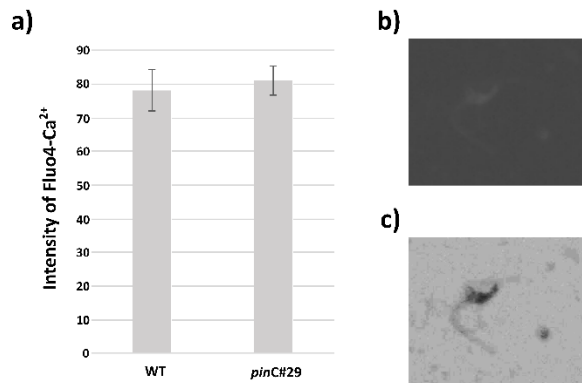

1353

1354

1355 **Supplemental Figure S7: Calcium concentration in Physcomitrella spermatozooids.** No  
1356 difference in Ca<sup>2+</sup> concentration in Physcomitrella WT and mutant sperm cells. a) Intensity of  
1357 single sperm cells after treatment with Fluo-4. b) grey scale picture of fluorescence image of  
1358 sperm cell treated with Fluo-4. c) negative image of b) to show sperm cell with flagellum. For  
1359 a) n = 15 spermatozooids from three different antheridia were examined.

1360

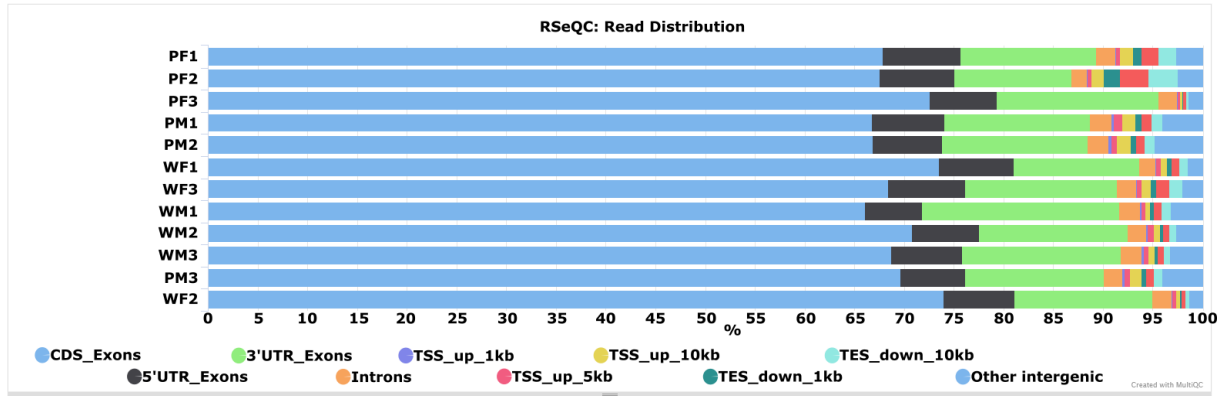

1361

|     | % Assigned | M Assigned |
|-----|------------|------------|
| PF1 | 47.7%      | 19.0       |
| PF2 | 49.5%      | 25.6       |
| PF3 | 69.8%      | 30.9       |
| PM1 | 54.3%      | 22.9       |
| PM2 | 60.1%      | 25.5       |
| PM3 | 57.1%      | 39.8       |
| WF1 | 61.2%      | 20.7       |
| WF2 | 65.7%      | 30.3       |
| WF3 | 56.9%      | 25.0       |
| WM1 | 57.2%      | 21.9       |
| WM2 | 61.5%      | 25.9       |
| WM3 | 65.0%      | 26.3       |

1362

1363 **Supplemental Figure S8: Quality control RNAseq.** Read distribution in *Physcomitrella* WT  
 1364 and *pinC* mutant gametangia, WM = WT antheridia, WF = WT archegonia, PM = *pinC*#29  
 1365 antheridia, PF = *pinC*#29 archegonia. CDS = coding sequence, UTR = untranslated region, TSS  
 1366 = transcription start sequence, TES = transcription end sequence. Quality control done with  
 1367 MultiQC (Galaxy Version 1.11+galaxy0).

1368

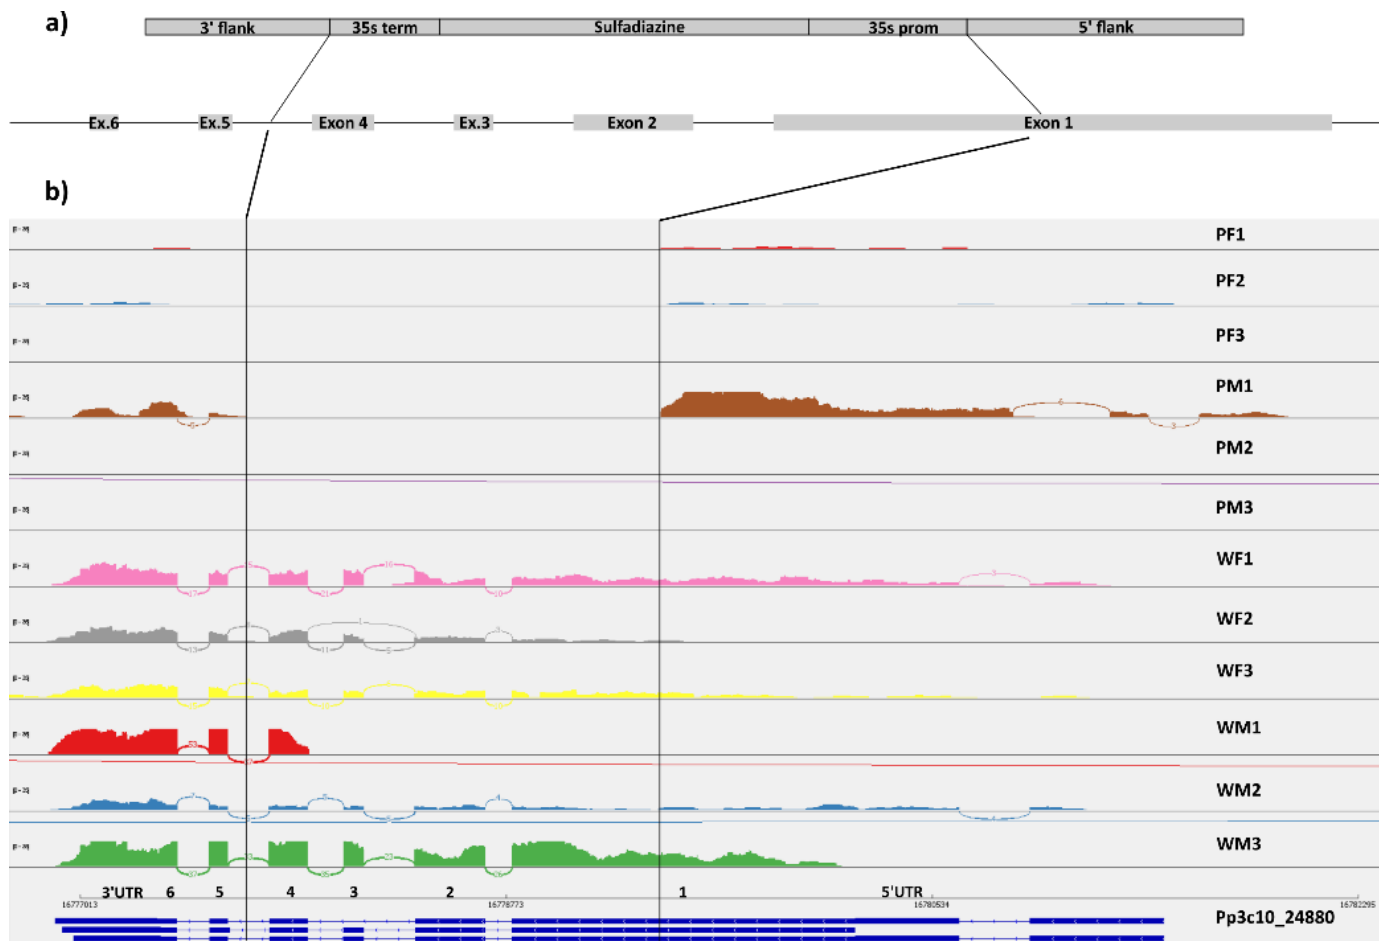

1369

1370

1371 **Supplemental Figure S9: Proof of *PpPINC* mutation in *pinC#29*.** Sashimi plot showing  
1372 integration of knockout construct in *Physcomitrella* WT background. a) Knockout construct for  
1373 the *PINC* gene. Black lines indicate the integration into the gene starting from the middle of  
1374 exon 1 to the intron between exon 4 and 5. b) Sashimi plot for the *PINC* gene in all samples.  
1375 Continuous read through of mapped fragments only in WT samples, confirming knockout of  
1376 the gene in the mutant.

1377

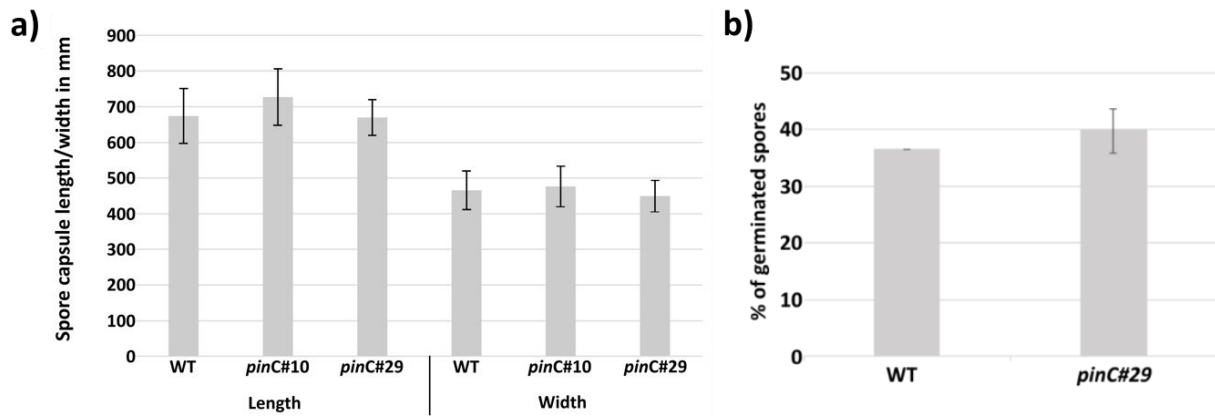

1378

1379 **Supplemental Figure S10: Size of spore capsules and spore germination rate.** a) Length  
1380 and width of mature spore capsules from *Physcomitrella* WT n = 15, mutant *pinC#10* and  
1381 mutant #29, n = 16. b) Germination rate of spores three days after plating. n = 3 plates.



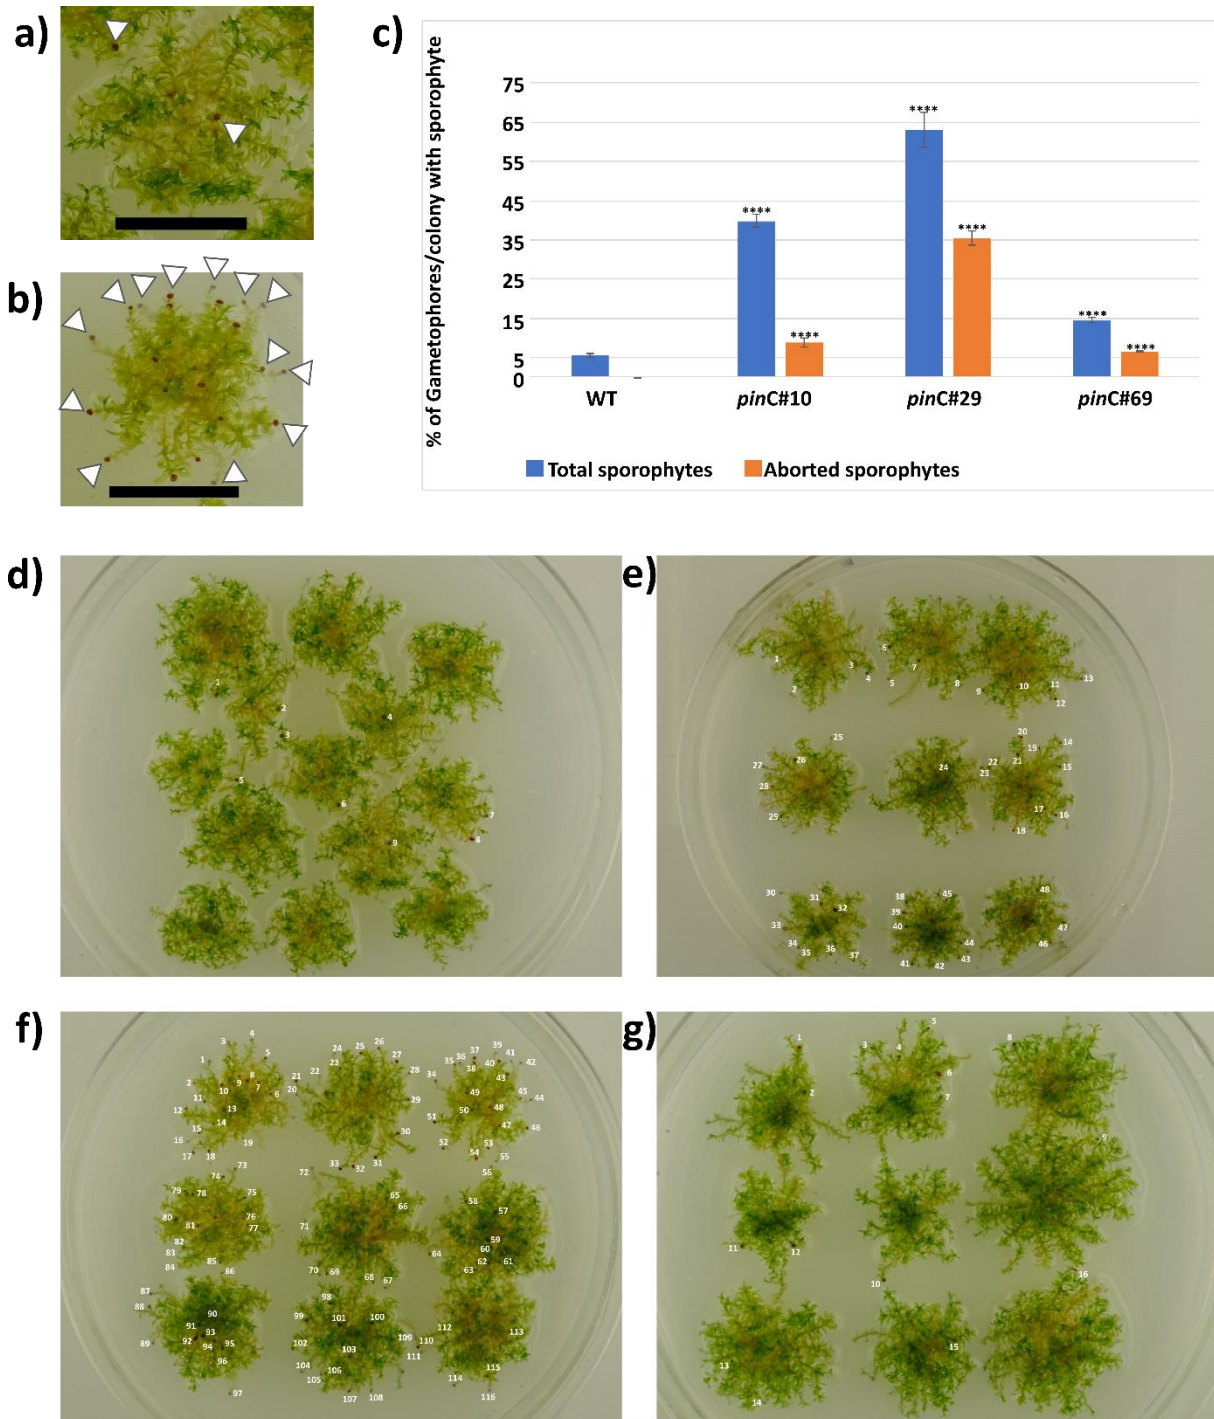

1382

1383

1384 **Supplemental Figure S11: Spore capsule numbers.** Physcomitrella spore capsules in a) WT  
 1385 and b) *pinC#29* mutant, white arrows mark sporophytes (for visibility reasons, not all  
 1386 sporophytes in b) are marked while all visible sporophytes are marked in a)). bar = 1cm. c)  
 1387 Percentage of gametophores with a sporophyte per colony, in blue total number of sporophytes  
 1388 (adult + aborted), in orange are only aborted sporophytes. Asterisks = p < 0.00005 of mutant  
 1389 lines against wild type, n (colonies) = WT (41), *pinC#10* (30), *pinC#29* (42), *pinC#69* (32) d)  
 1390 wild type plate with 9 sporophytes counted. e) *pinC#10* plate with 48 sporophytes. f) *pinC#29*  
 1391 plate with 116 sporophytes. g) *pinC#69* with 16 sporophytes.

1392

1393 **Supplemental Table 1:** Primers used in *Physcomitrella* WT and mutant lines.

| Name               | Sequence                                                 | Comment                                                                       |
|--------------------|----------------------------------------------------------|-------------------------------------------------------------------------------|
| P3-KO Fw           | 5'-GGGATCCATGTTGGCCTACGCGTCTGT-3'                        | Amplified region for <i>pinC</i> knockout construct                           |
| P3-KO Rv           | 5'-GAAGCTTCTGGGGAGTTCAACACCATT-3'                        |                                                                               |
| 5PinCprom_f+CA5    | 5'- agcttaacgtagccactcTCCTTTGTGTGGAGTAGAG-3'             | Gibson primers for amplification of PpPINC promoter region, (capital letters) |
| 3PinCprom_r+Citrin | 5'-<br>CACGTCGACAGATCGTCAAGgcagaagttcatgggaggtgga-<br>3' |                                                                               |
| Pin3f_ex1-2        | 5'-ACGTGAACATTTCCTCGGTTC-3'                              | RT-PCR, middle of exon 1 to exon 2 of PpPINC                                  |
| Pin3r_ex2          | 5'-GTTCGGATTGCGAGTGAGTT-3'                               |                                                                               |
| C45_fwd            | 5'-GGCTGGTCATGGGTTGCG-3'                                 | cDNA reference gene                                                           |
| C45_rev            | 5'-GAGGTCAACTGTCTCGCC-3'                                 |                                                                               |
| 35SPqPCR_f         | 5'-CCATTGCCAGCTATCTGTC-3'                                | Determination of transgene <i>pinC</i> copy number via qPCR                   |
| 35SPqPCR_r         | 5'-CATTGCGATAAAGGAAAGGC-3'                               |                                                                               |

1394

1395 **Supplemental Table 2: Differentially expressed genes in Physcomitrella WT and mutant.**  
 1396 Single genes found in comparisons of Physcomitrella a) mutant (PM) vs wildtype (WM)  
 1397 antheridia b) mutant (PF) vs wild type (WF) archegonia; BP = biological process, CC = cellular  
 1398 compartment, MF = molecular function.

1399 a)

| Upregulated genes mutant (PM) vs. wildtype (WM) antheridia |            |            |                                                                                                                                             |                                                       |                                                      |
|------------------------------------------------------------|------------|------------|---------------------------------------------------------------------------------------------------------------------------------------------|-------------------------------------------------------|------------------------------------------------------|
| geneID                                                     | Foldchange | p-Adjust   | GO_annot_BP                                                                                                                                 | GO_annot_MF                                           | GO_annot_CC                                          |
| Pp3c26_6020                                                | 2,61799094 | 0,00574099 | single-multicellular organism process; anatomical structure development; ion transmembrane transport; single-organism developmental process | ion channel activity                                  | cell part; integral component of membrane            |
| Pp3c26_3990                                                | 2,60429982 | 3,58E-08   | transmembrane transport                                                                                                                     | substrate-specific transmembrane transporter activity | chloroplast envelope; integral component of membrane |

1400

| geneID      | PM1 | PM2 | PM3  | WM1 | WM2 | WM3 |
|-------------|-----|-----|------|-----|-----|-----|
| Pp3c26_6020 | 209 | 282 | 1259 | 15  | 50  | 32  |
| Pp3c26_3990 | 676 | 735 | 822  | 79  | 101 | 101 |

1401

1402

| Downregulated genes mutant (PM) vs. wildtype (WM) antheridia |             |            |                                                                 |                                                                                                              |                                                    |
|--------------------------------------------------------------|-------------|------------|-----------------------------------------------------------------|--------------------------------------------------------------------------------------------------------------|----------------------------------------------------|
| geneID                                                       | Foldchange  | p-Adjust   | GO_annot_BP                                                     | GO_annot_MF                                                                                                  | GO_annot_CC                                        |
| Pp3c9_8920                                                   | -2,14177862 | 0,00160142 | dolichol biosynthetic process                                   | amino acid binding                                                                                           | chloroplast stroma; chloroplast thylakoid membrane |
| Pp3c14_8940                                                  | -2,3368623  | 0,01313347 | .                                                               | .                                                                                                            | integral component of membrane                     |
| Pp3c20_22670                                                 | -2,48823907 | 0,00673352 | positive regulation of transcription, DNA-templated             | zinc ion binding; sequence-specific DNA binding; sequence-specific DNA binding transcription factor activity | nucleus                                            |
| Pp3c1_22810                                                  | -2,68377153 | 0,00973054 | cell wall modification:pectin catabolic process                 | pectinesterase activity:aspartyl esterase activity                                                           | cell wall:extracellular region                     |
| Pp3c19_15670                                                 | -2,68772125 | 0,00973054 | cellular component organization or biogenesis; cellular process | .                                                                                                            | cytoplasm                                          |

|              |             |          |                                                                                                                                                    |                                                                                            |         |
|--------------|-------------|----------|----------------------------------------------------------------------------------------------------------------------------------------------------|--------------------------------------------------------------------------------------------|---------|
| Pp3c3_4950   | -2,71566077 | 0,009008 | regulation of biological quality; regulation of transcription, DNA-templated; asymmetric cell division; leaf development; radial pattern formation | sequence-specific DNA binding; sequence-specific DNA binding transcription factor activity | nucleus |
| Pp3c3_11110  | -3,07745056 | 4,01E-08 | proteolysis                                                                                                                                        | aspartic-type endopeptidase activity                                                       | .       |
| Pp3c21_8410  | -3,24497467 | 5,52E-05 | peptidyl-tyrosine dephosphorylation                                                                                                                | protein tyrosine phosphatase activity                                                      | .       |
| Pp3c12_11710 | -4,86650335 | 1,63E-14 | .                                                                                                                                                  | .                                                                                          | .       |

1403

| geneID       | PM1  | PM2  | PM3  | WM1   | WM2  | WM3   |
|--------------|------|------|------|-------|------|-------|
| Pp3c9_8920   | 1079 | 1248 | 2115 | 10980 | 5147 | 6717  |
| Pp3c14_8940  | 531  | 119  | 190  | 1918  | 3043 | 2972  |
| Pp3c20_22670 | 36   | 8    | 48   | 286   | 383  | 271   |
| Pp3c3_11110  | 170  | 141  | 99   | 1975  | 1576 | 1902  |
| Pp3c21_8410  | 1    | 5    | 7    | 100   | 197  | 253   |
| Pp3c12_11710 | 232  | 115  | 230  | 71101 | 8547 | 41718 |
| Pp3c1_22810  | 1    | 0    | 0    | 184   | 76   | 86    |
| Pp3c19_15670 | 1    | 0    | 2    | 123   | 90   | 54    |
| Pp3c3_4950   | 2    | 0    | 0    | 231   | 161  | 82    |

1404

1405 **b)**

| Upregulated genes mutant (PF) archegonia vs. wildtype (WF) archegonia |            |          |             |                                    |             |
|-----------------------------------------------------------------------|------------|----------|-------------|------------------------------------|-------------|
| geneID                                                                | Foldchange | p-Adjust | GO_annot_BP | GO_annot_MF                        | GO_annot_CC |
| Pp3c11_4360                                                           | 3,28704921 | 5,88E-11 | proteolysis | serine-type endopeptidase activity | cell part   |

1406

| geneID      | PF1 | PF2 | PF3 | WF1 | WF2 | WF3 |
|-------------|-----|-----|-----|-----|-----|-----|
| Pp3c11_4360 | 154 | 241 | 220 | 0   | 0   | 4   |

1407

| Downregulated genes mutant (PF) archegonia vs. wildtype (WF) archegonia |             |          |             |                   |             |
|-------------------------------------------------------------------------|-------------|----------|-------------|-------------------|-------------|
| geneID                                                                  | Foldchange  | p-Adjust | GO_annot_BP | GO_annot_MF       | GO_annot_CC |
| Pp3c7_8820                                                              | -2,55854236 | 6,08E-07 | .           | .                 | .           |
| Pp3c6_26100                                                             | -6,49563884 | 9,91E-73 | .           | metal ion binding | .           |

1408

| geneID      | PF1 | PF2 | PF3 | WF1  | WF2  | WF3  |
|-------------|-----|-----|-----|------|------|------|
| Pp3c7_8820  | 72  | 129 | 58  | 1134 | 1082 | 3960 |
| Pp3c6_26100 | 0   | 0   | 0   | 989  | 1581 | 1305 |

1409
